# Supplementary material
Source: PubMed Central journal article supplement (PMC7116625)
Supplement: EMS107983-supplement-Supplementary_figures_and_tables.pdf [file EMS107983-supplement-Supplementary_figures_and_tables.pdf]

## Supplementary Information

### Concerted dynamics of an LPS translocon in the presence of substrate and an antimicrobial peptide

Francesco Fiorentino<sup>1</sup>, Joshua B. Sauer<sup>1,2</sup>, Xingyu Qiu<sup>1</sup>, Robin A. Corey<sup>2</sup>, C. Keith Cassidy<sup>2</sup>, Benjamin Mynors-Wallis<sup>2</sup>, Shahid Mehmood<sup>1,#</sup>, Jani Reddy Bolla<sup>1,\*</sup>, Phillip J. Stansfeld<sup>2,3,\*</sup>, Carol V. Robinson<sup>1,\*</sup>

<sup>1</sup>Department of Chemistry, University of Oxford, South Parks Road, Oxford OX1 3QZ, UK

<sup>2</sup>Department of Biochemistry, University of Oxford, South Parks Road, Oxford OX1 3QU, UK

<sup>3</sup>School of Life Sciences and Department of Chemistry, University of Warwick, Gibbet Hill Campus, Coventry, CV4 7AL, UK

#Current address: The Francis Crick Institute, 1 Midland Road, London NW1 1ST, UK

\*Correspondence: jani.bolla@chem.ox.ac.uk; phillip.stansfeld@warwick.ac.uk  
carol.robinson@chem.ox.ac.uk

### Supplementary Figures

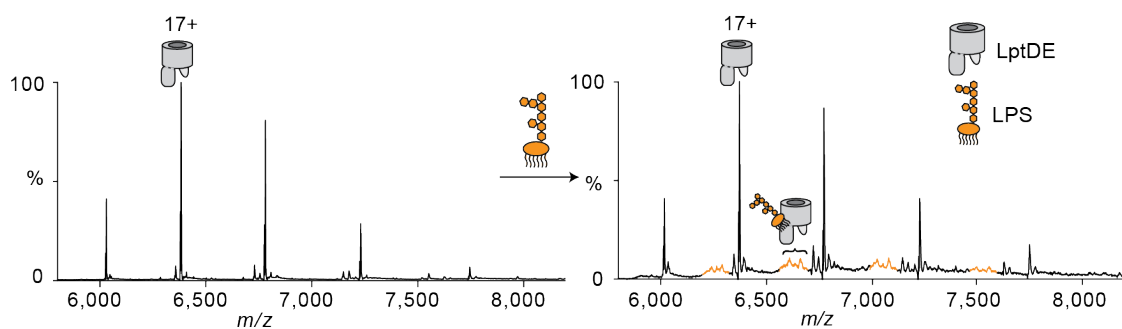

**Supplementary Figure 1. nMS analysis of LptDE-LPS interaction.** LptDE (5 μM, left) in 0.5% (w/v) C<sub>8</sub>E<sub>4</sub> was mixed with 10 μM LPS. A series of different adducts of molecular mass between 4 and 5 kDa was observed upon LPS addition (orange).

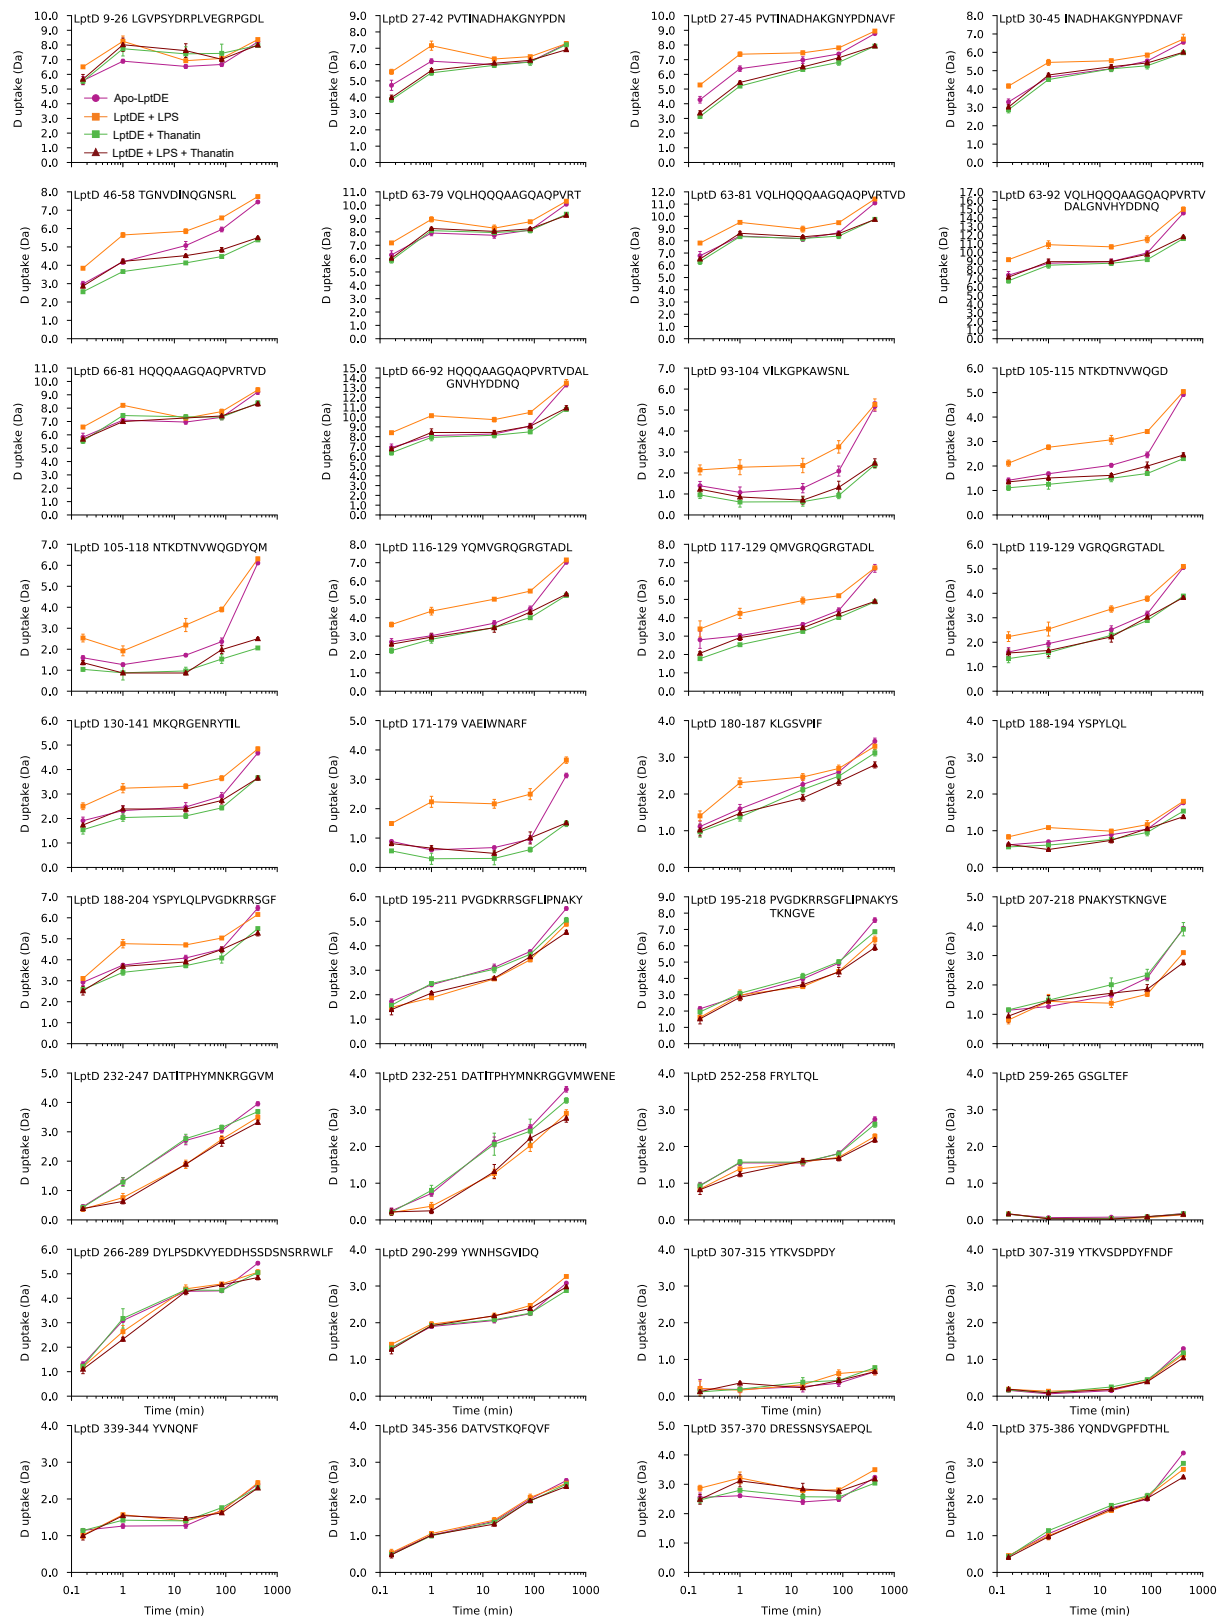

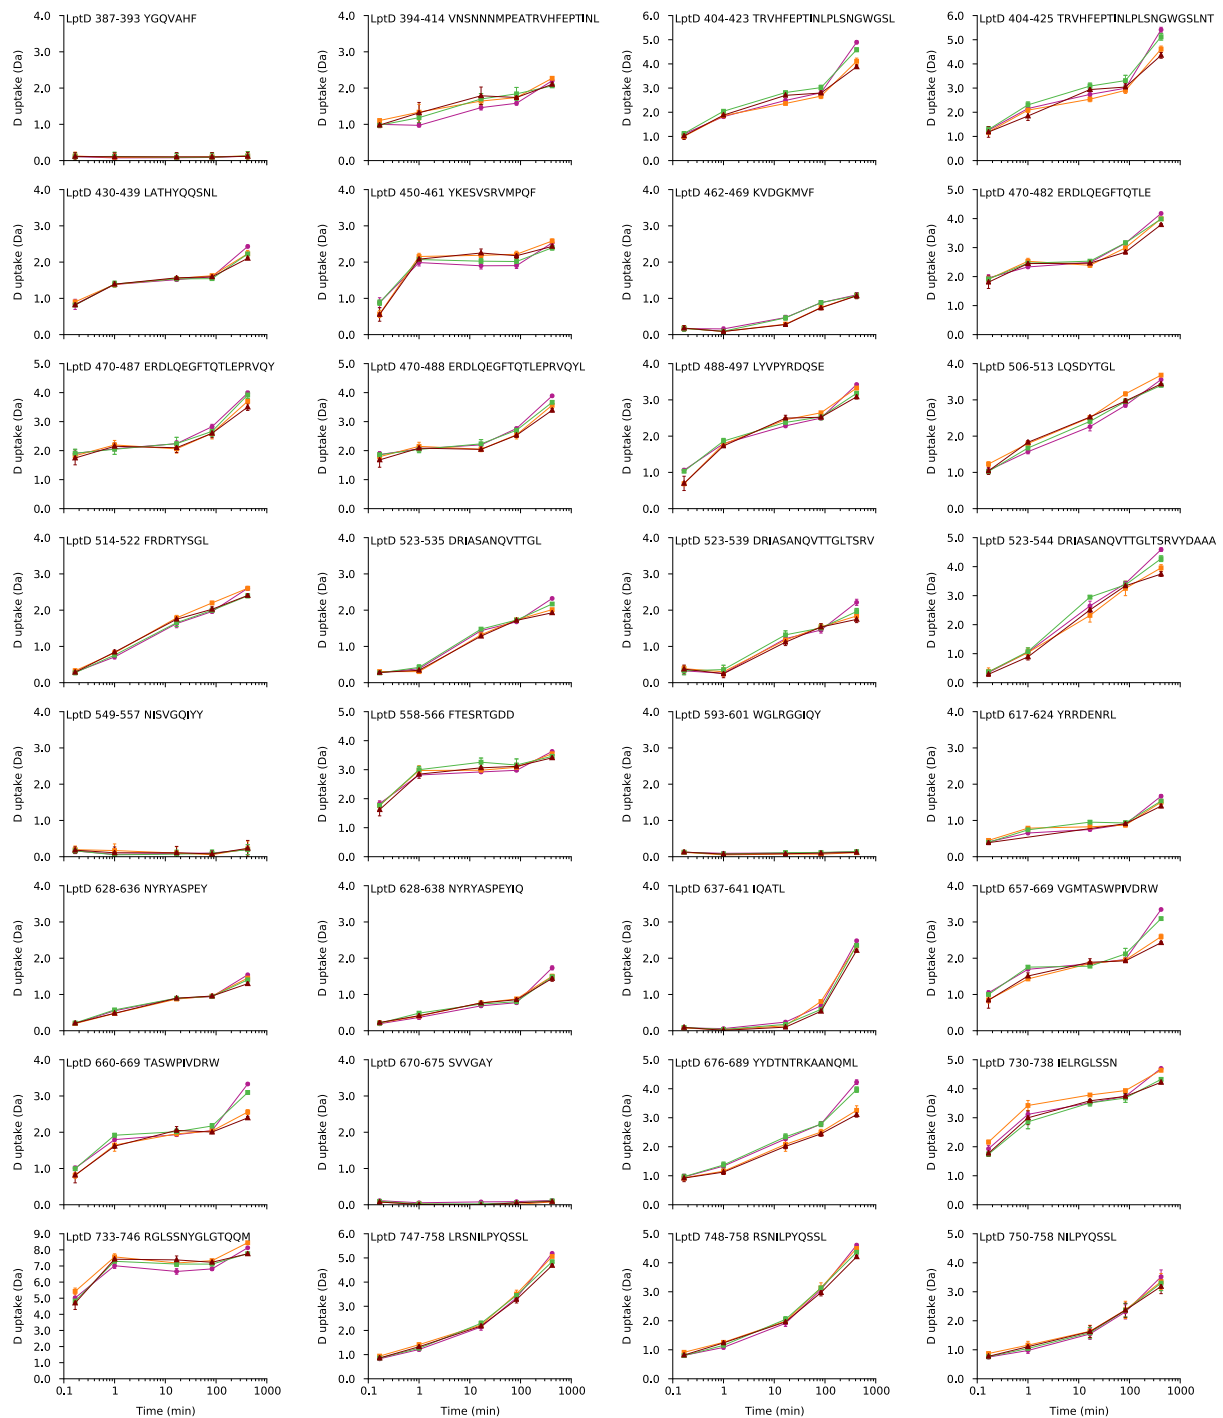

**Supplementary Figure 2. Deuterium uptake plots for LptD in four states.** Deuterium uptake is plotted as a function of labelling time (0.167 – 420 min) for all identified peptides. The apo state is indicated in purple, LPS-bound state in orange, thanatin-bound state in green, and LPS + thanatin state in maroon. Standard deviations are plotted as error bars ( $n_{\text{biological}} = 2$ ;  $n_{\text{technical}} = 3$ ) but are in some instances too small to be visible.

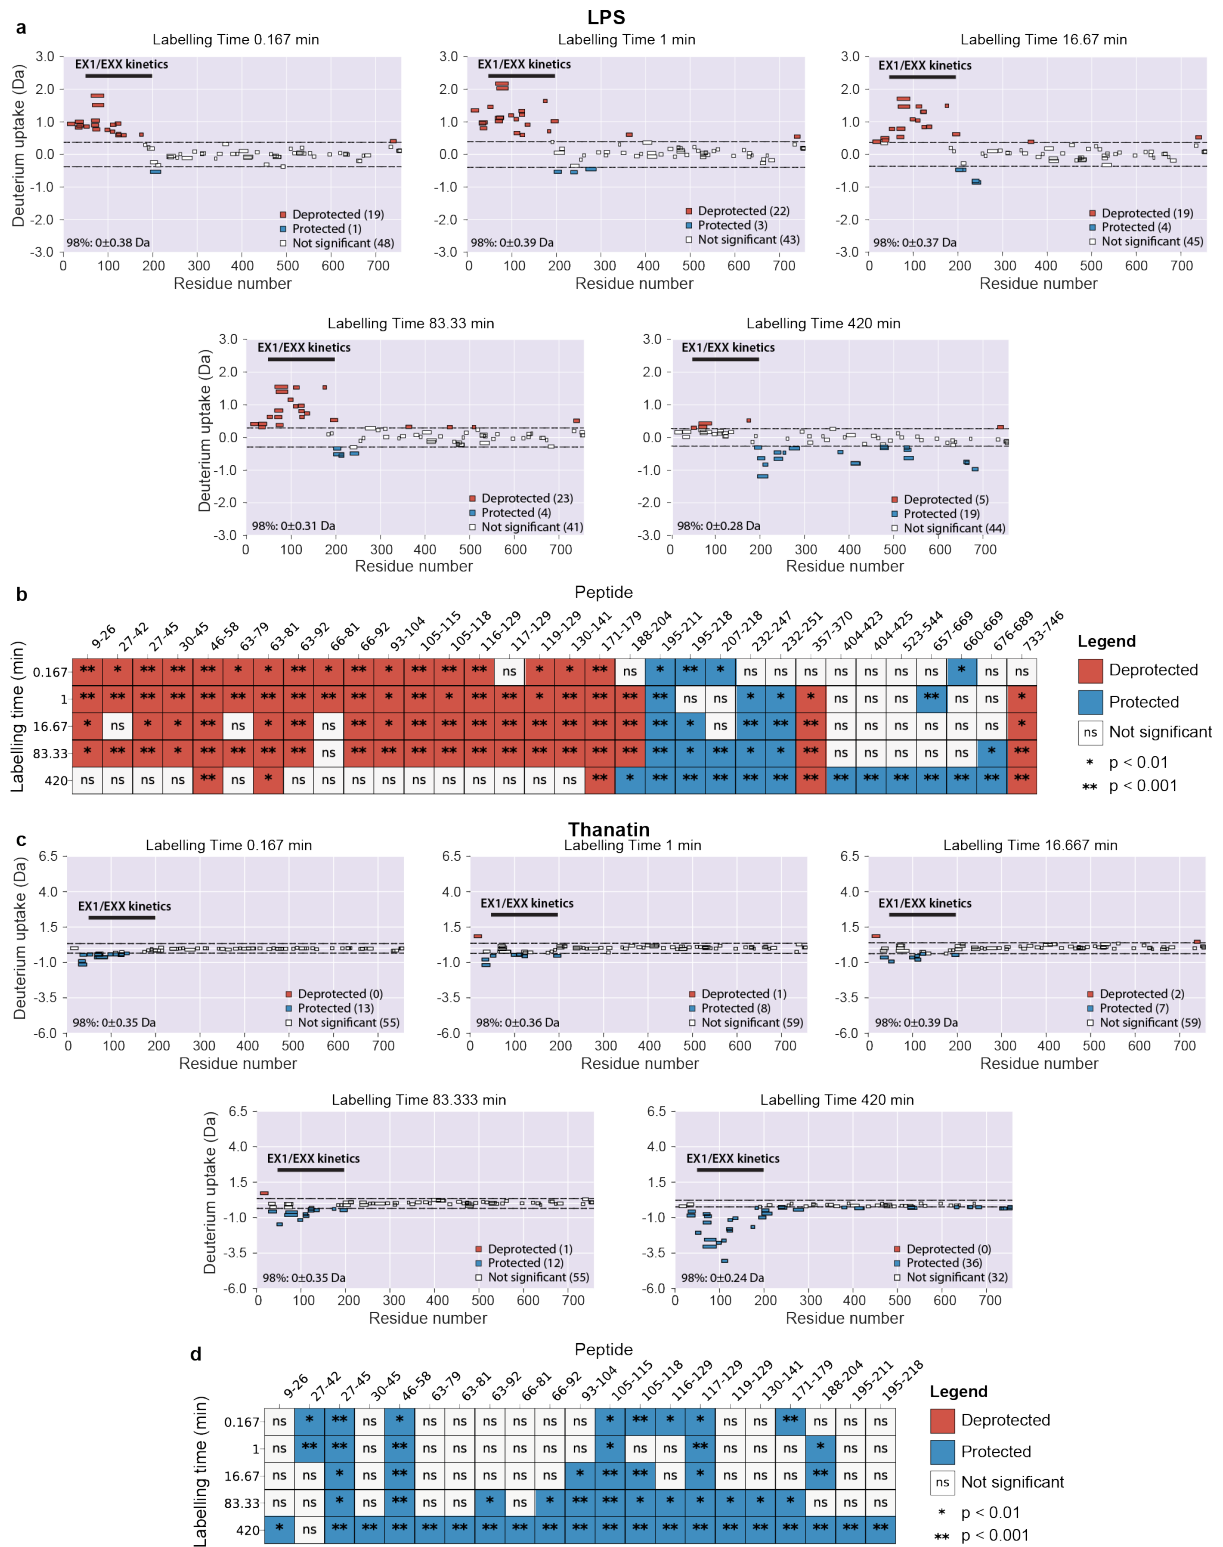

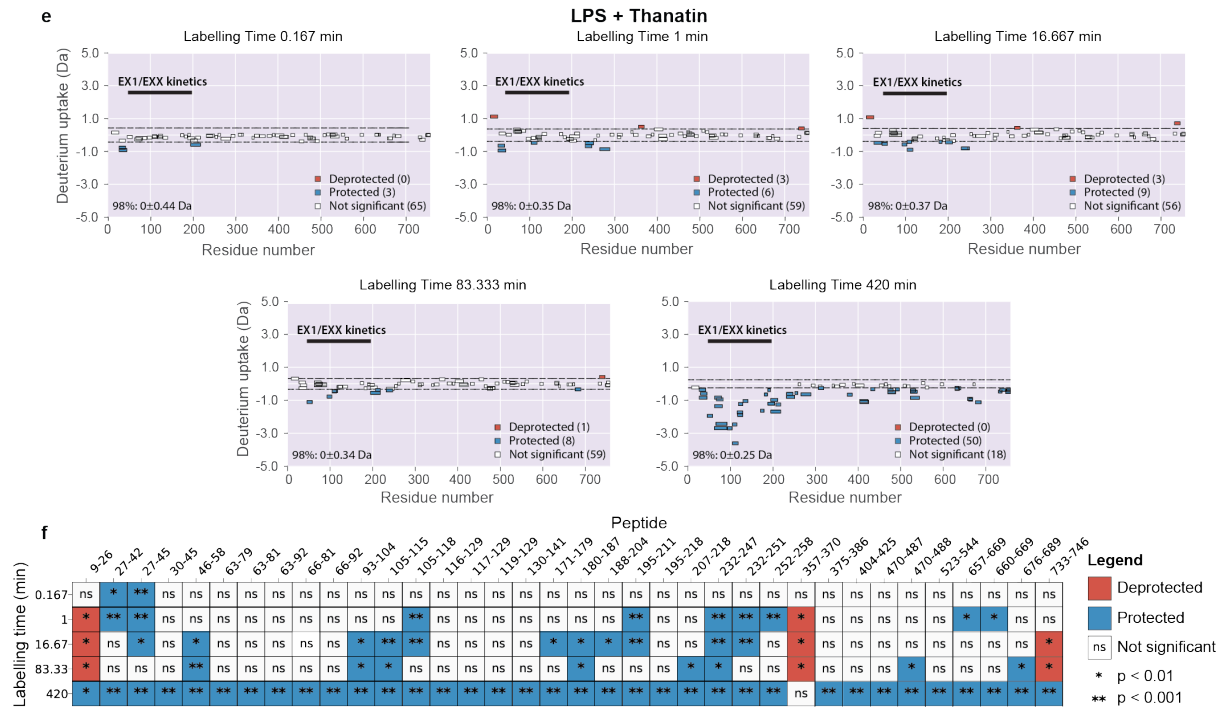

**Supplementary Figure 3. Woods plots and peptide table for LptD in the presence of LPS, Thanatin or both ligands.** (a) Woods plots showing the difference in deuterium uptake for each identified peptide in the presence of LPS. The length of the lines represents the length of the peptides. The confidence interval (CI) used to analyse each labelling time is 98%. The region showing EX1 kinetics is indicated in each Woods plot. (b) Peptides having a difference in deuterium uptake greater than the calculated CI according to the described methods are included in the table and a Student's t-test (two-sided, unpaired,  $p < 0.01$ ) was performed to finally include only statistically significant differences. (c) Woods plots showing the difference in deuterium uptake for each identified peptide in the presence of thanatin. (d) Peptides having a difference in deuterium uptake greater than the calculated CI according to the described methods are included in the table and a Student's t-test (two-sided, unpaired,  $p < 0.01$ ) was performed to finally include only statistically significant differences. (e) Woods plots showing the difference in deuterium uptake for each identified peptide in the presence of LPS and thanatin. (f) Peptides having a difference in deuterium uptake greater than the calculated CI according to the described methods are included in the table and Student's t-test (two-sided, unpaired,  $p < 0.01$ ) was performed to finally include only statistically significant differences. Red colour indicates deprotected peptides, blue indicates protected; white and 'ns' indicate non-significant difference; \*  $p < 0.01$ ; \*\*  $p < 0.001$ . Detailed information of HDX-MS data is provided in Supplementary Table 2.

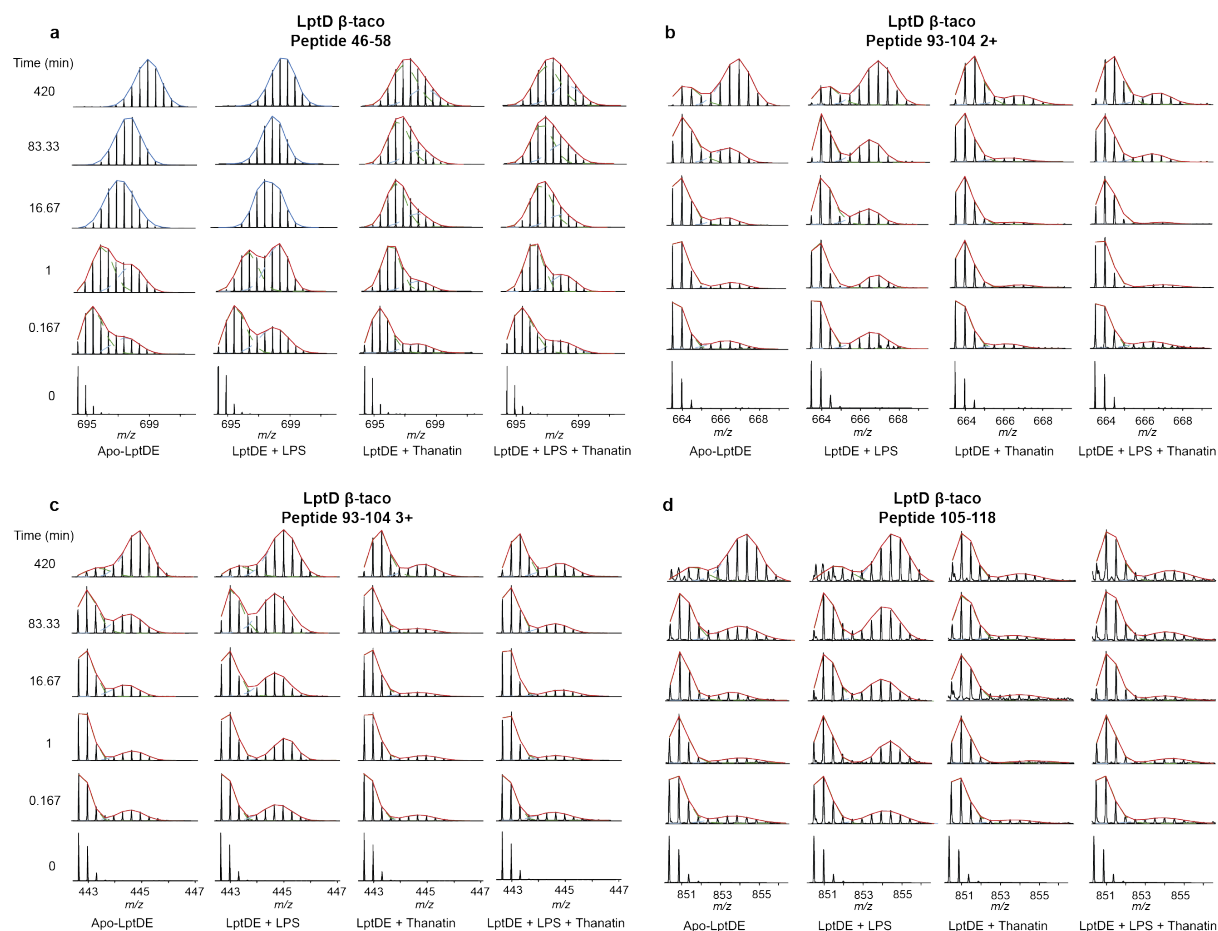

**Supplementary Figure 4. Representative mass spectra for peptides showing EX1/EXX kinetics.** Mass spectra are shown for apo-LptDE, LPS, thanatin or LPS + thanatin states. Two binomial isotopic envelopes produced the best fit for the spectra yielding low- (green) and high-mass (light blue) populations. The sums of the two binomial distributions are shown in red. In the case of peptide 46-58 (a) it was not always possible to unambiguously determine the two populations; therefore, the blue line represents a single binomial fit. (b) Peptide 93-104 (charge state 2+). (c) Peptide 93-104 (charge state 3+). (d) Peptide 105-118.

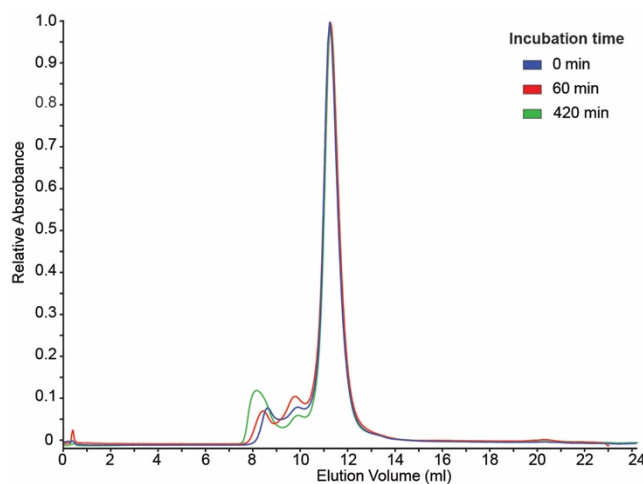

**Supplementary Figure 5. Analytical SEC.** Analytical SEC of LptDE performed in the buffer used for protein purification and HDX-MS experiments. The protein has been incubated at 20 °C for 0, 60, and 420 min before injection in the SEC column.

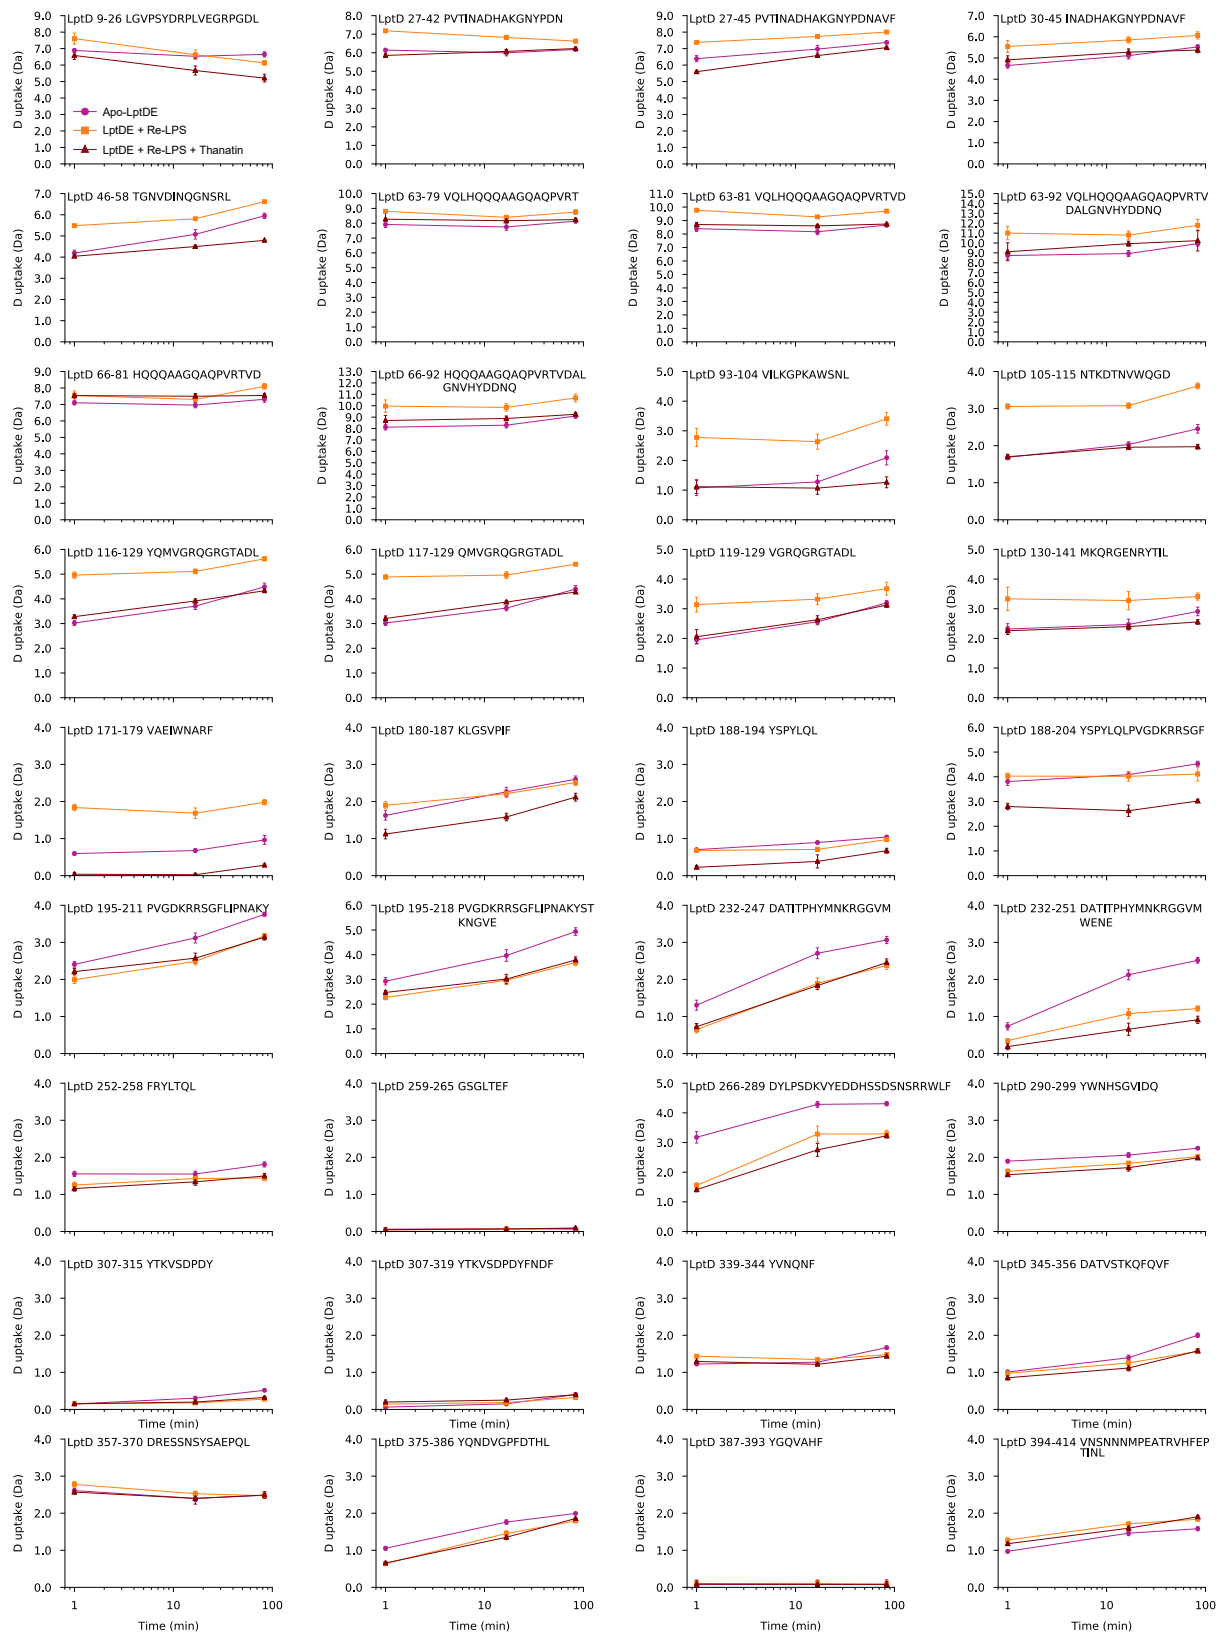

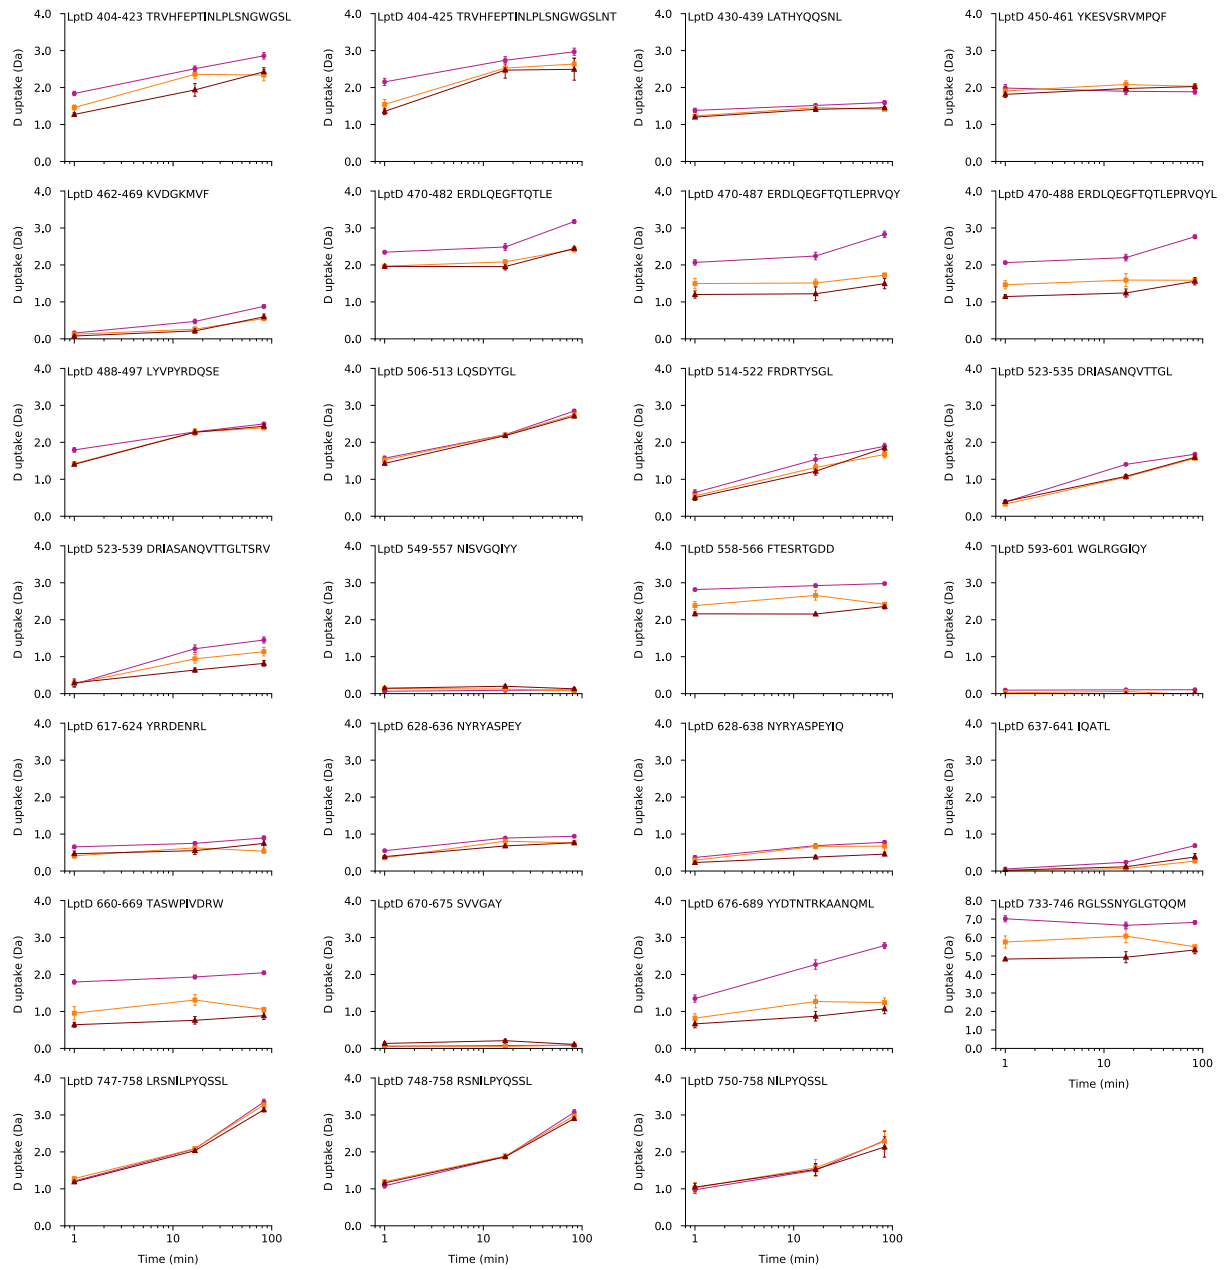

**Supplementary Figure 6. Deuterium uptake plots for LptD in three states.** Deuterium uptake is plotted as a function of labelling time (1 – 83.33 min) for all identified peptides. The apo state is indicated in purple, Re-LPS-bound state in orange, and Re-LPS + thanatin state in maroon. Standard deviations are plotted as error bars ( $n_{\text{biological}} = 1$ ;  $n_{\text{technical}} = 3$ ) but are in some instances too small to be visible.

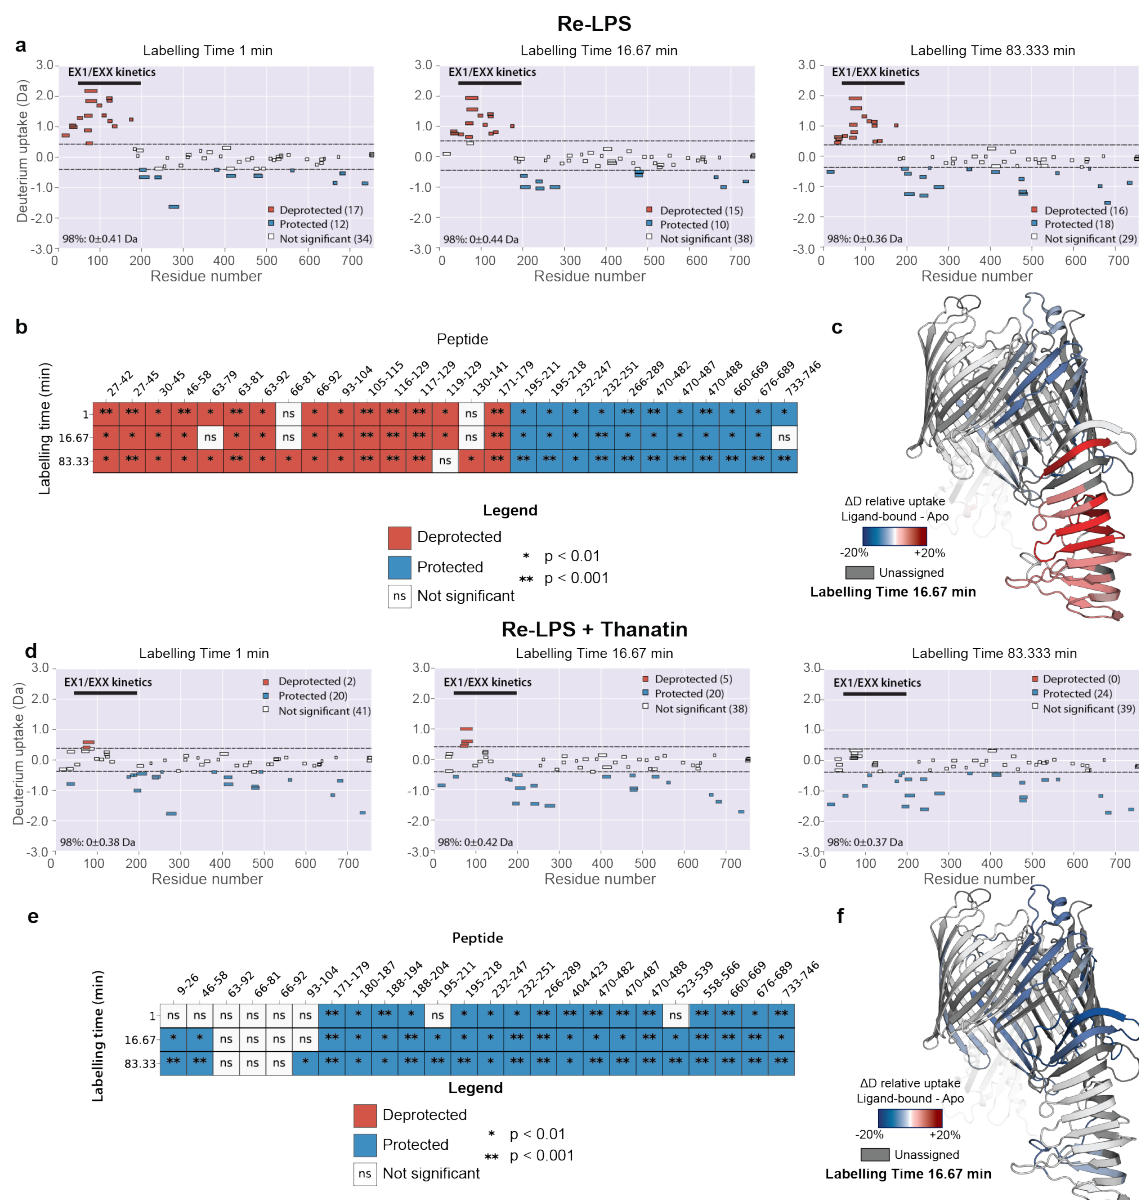

**Supplementary Figure 7. Woods plots and peptide table for LptD in the presence of Re-LPS or Re-LPS+Thanatin.** (a) Woods plots showing the difference in deuterium uptake for each identified peptide in the presence of Re-LPS. The length of the lines represents the length of the peptides. The CI used to analyse each labelling time is 98%. The region showing EX1 kinetics is indicated in each Woods plot. (b) Peptides having a difference in deuterium uptake greater than the calculated CI according to the described methods are included in the table and Student's t-test (two-sided, unpaired,  $p < 0.01$ ) was performed to finally include only statistically significant differences. (c) Difference in relative deuterium uptake (scaled for the number of residues of each peptide) at the 16.67 min labelling time mapped on the crystal structure of LptD (PDB ID: 5IV9). (d) Woods plots showing the difference in deuterium uptake for each identified peptide in the presence of Re-LPS and thanatin. (e) Peptides having a difference in deuterium uptake greater than the calculated CI according to the described methods are included in the table and Student's t-test (two-sided, unpaired,  $p < 0.01$ ) was performed to finally include only statistically significant differences. (f) Difference in relative deuterium uptake (scaled for the number of residues of each peptide) at the 16.67 min labelling time mapped on the crystal structure of LptD (PDB ID: 5IV9). Only peptides showing significant difference are coloured. Red colour indicates deprotected peptides, blue indicates protected; white and 'ns' indicate non-significant difference; \*  $p < 0.01$ ; \*\*  $p < 0.001$ . Detailed information of HDX-MS data is provided in Supplementary Table 3.

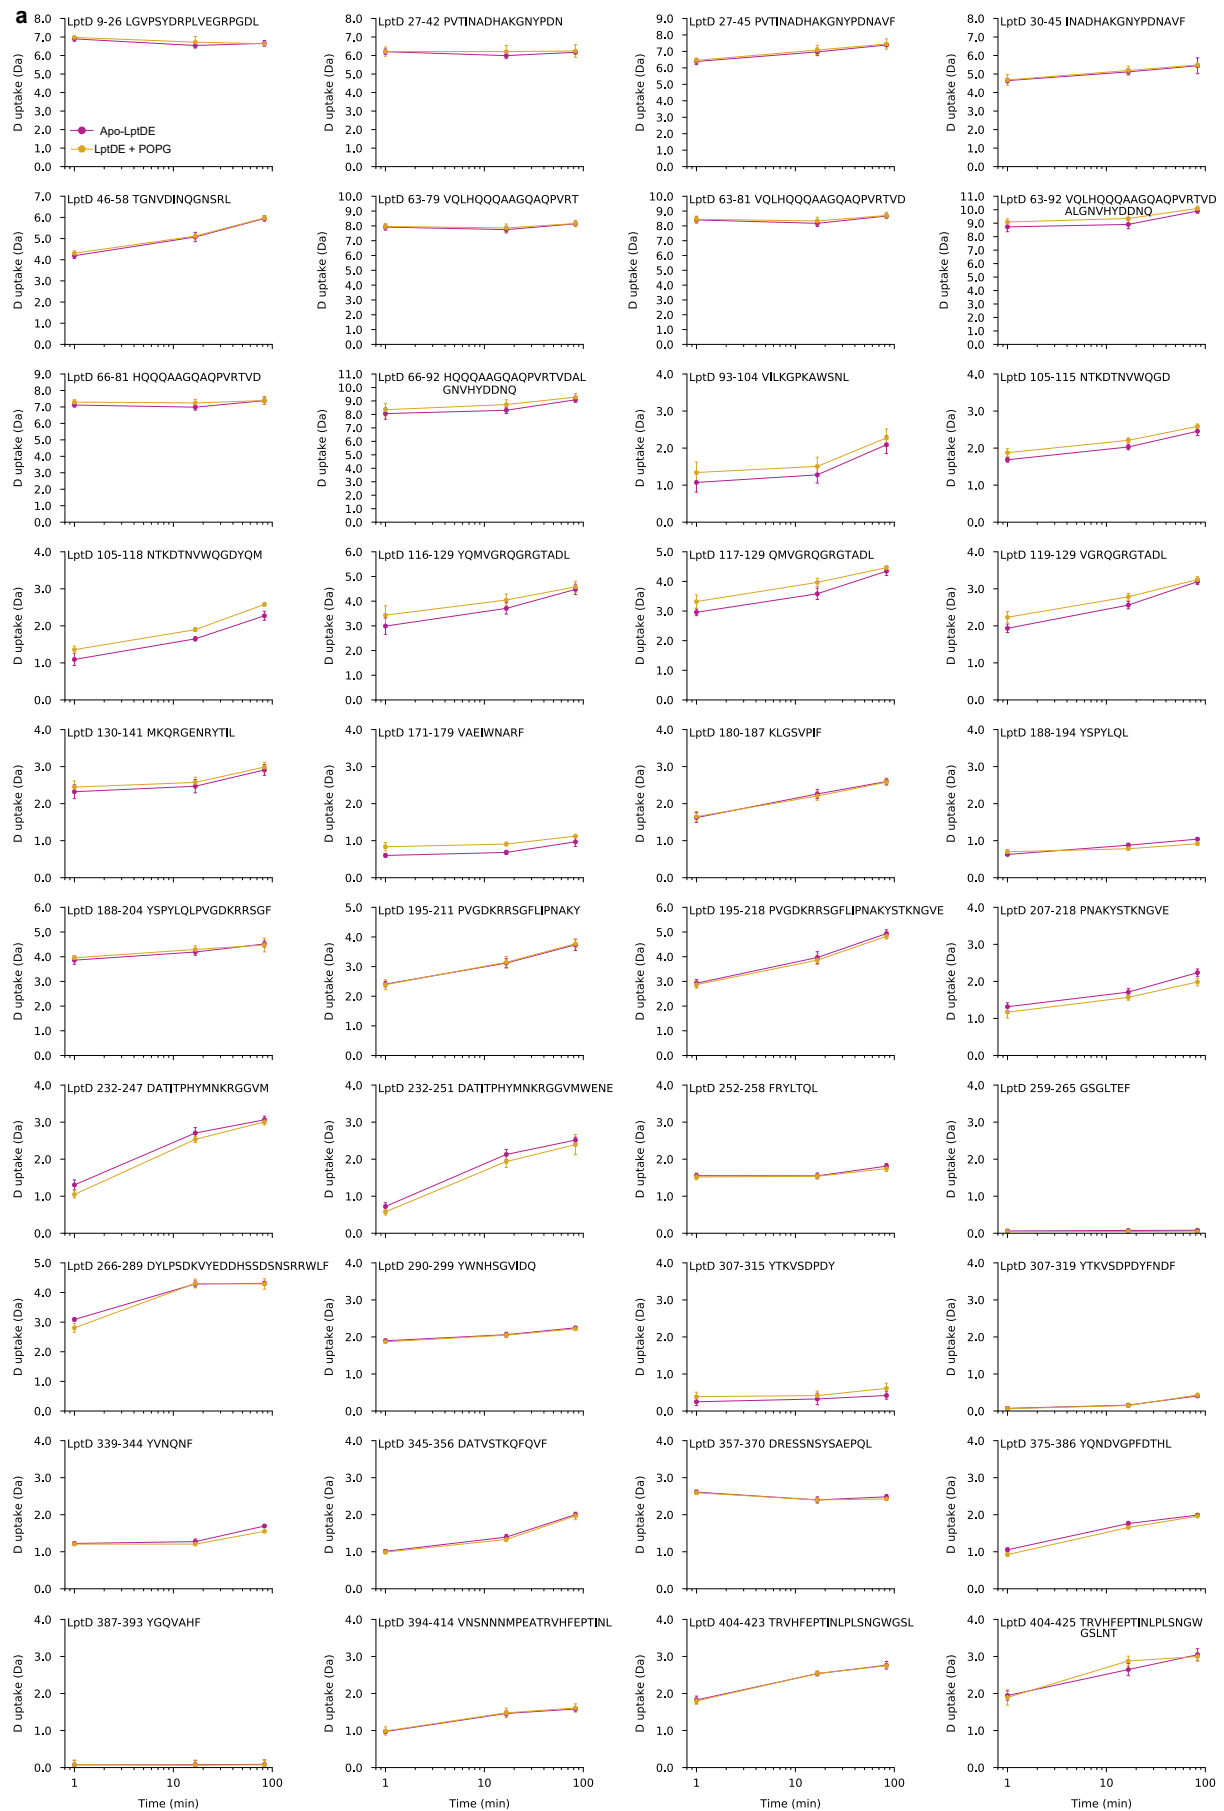

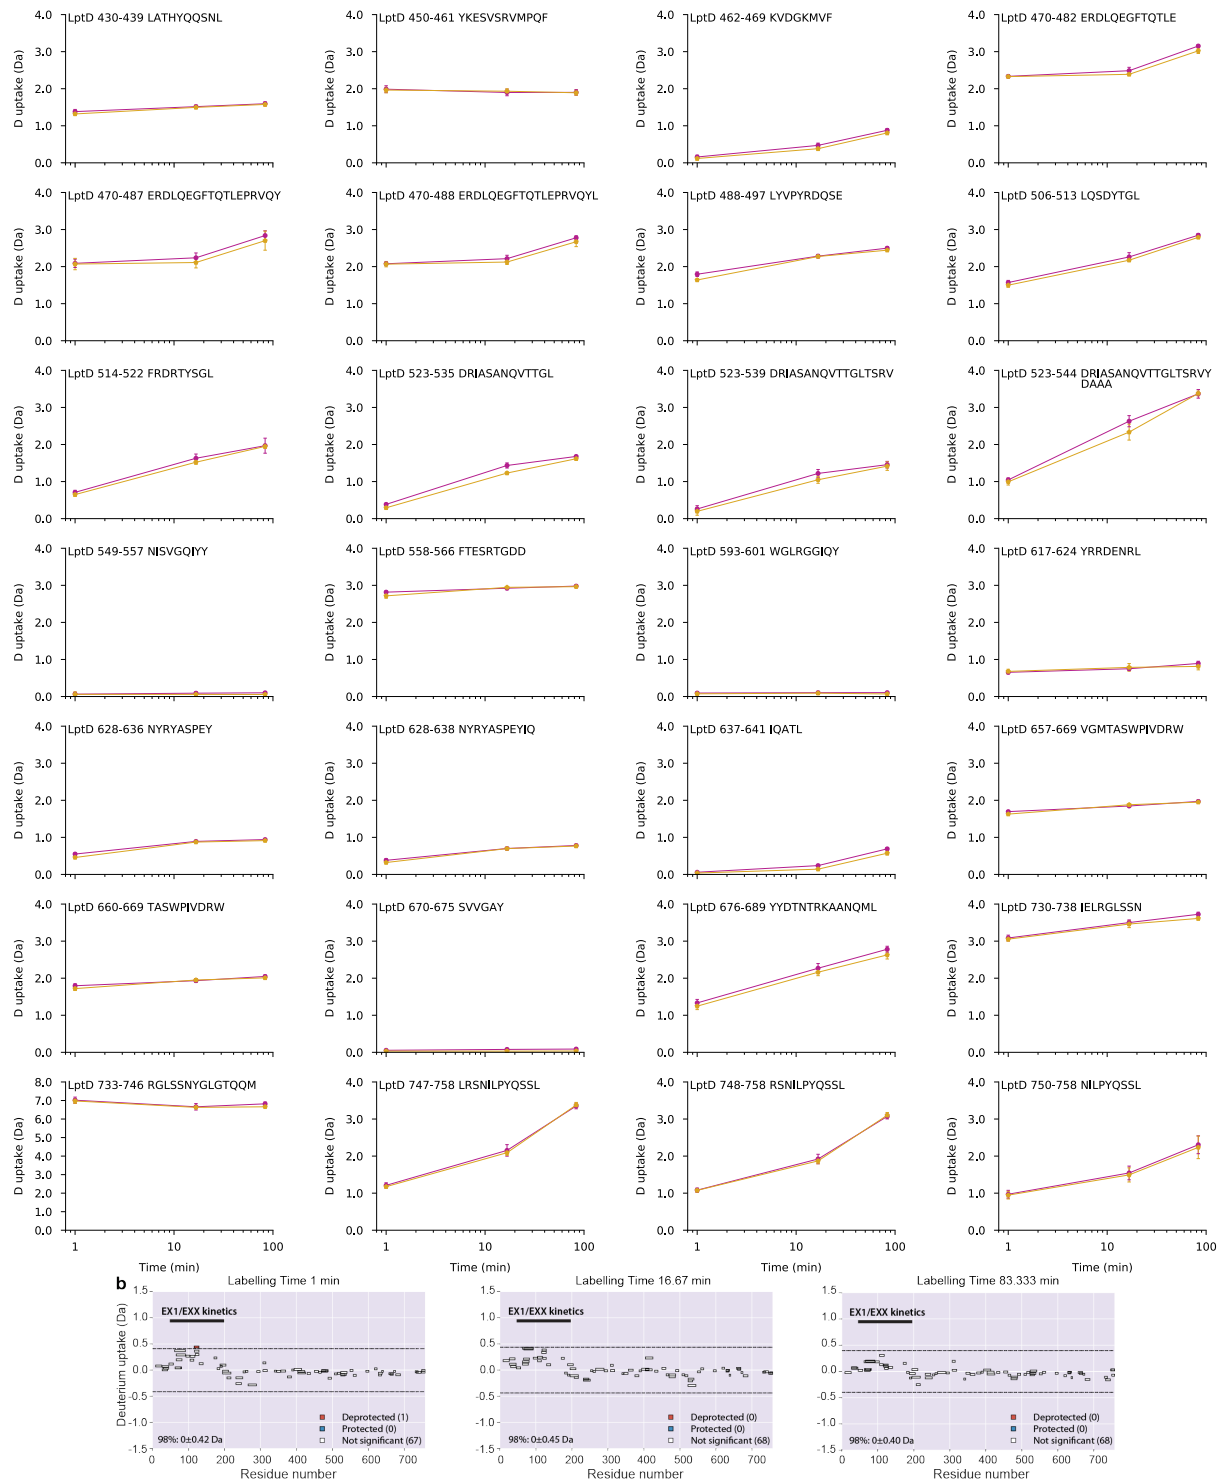

**Supplementary Figure 8. Deuterium uptake and woods plots for LptD in the presence of POPG.** (a) Deuterium uptake is plotted as a function of labelling time (1 – 83.33 min) for all identified peptides. The apo state is indicated in purple, and POPG state in gold. Standard deviations are plotted as error bars ( $n_{\text{biological}} = 1$ ;  $n_{\text{technical}} = 3$ ) but are in some instances too small to be visible. (b) Woods plots showing the difference in deuterium uptake for each identified peptide in the presence of Re-LPS. The length of the lines represents the length of the peptides. The CI used to analyse each labelling time is 98%. The region showing EX1 kinetics is indicated in each Woods plot. Red colour indicates deprotected peptides, blue indicates protected, white indicate non-significant difference. No statistically significant peptides were identified. Detailed information of HDX-MS data is provided in Supplementary Table 3.

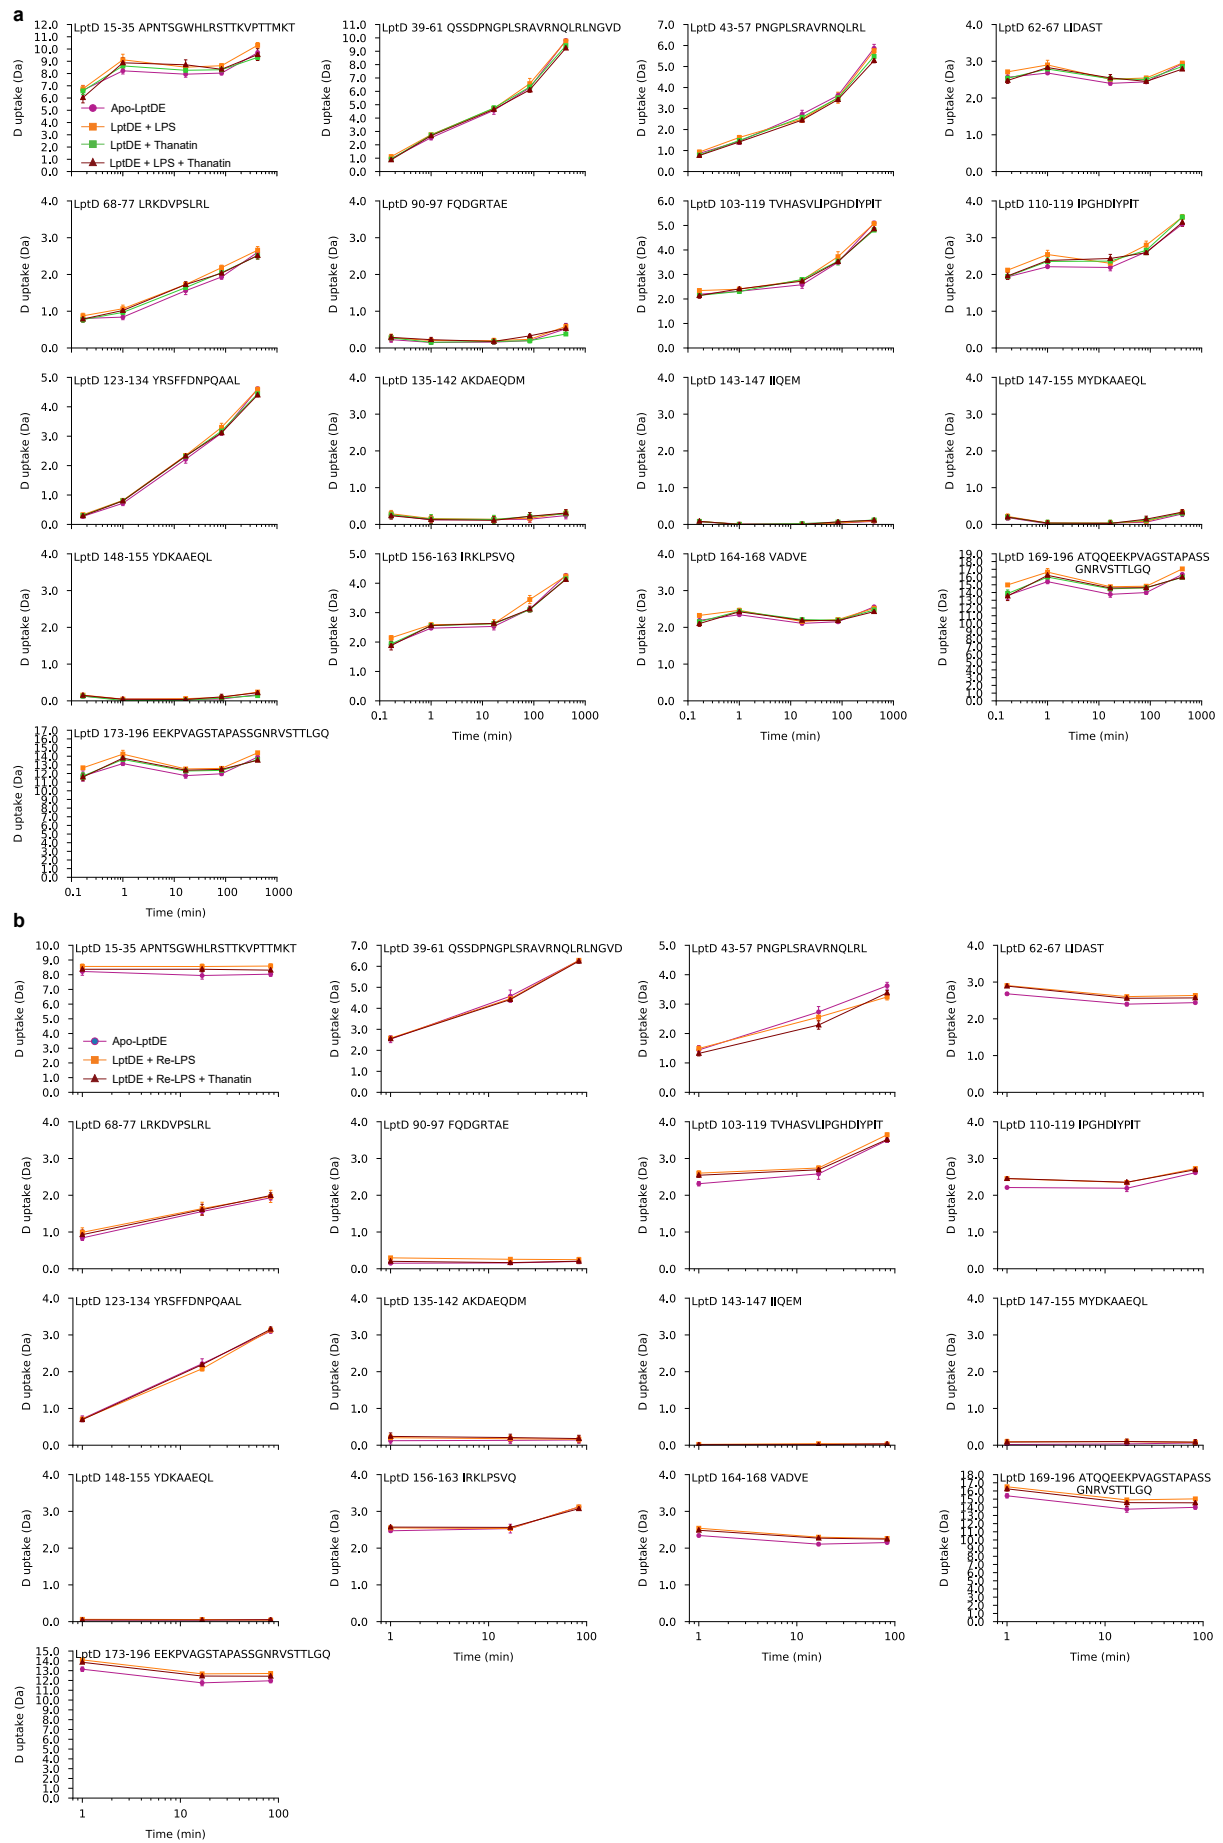

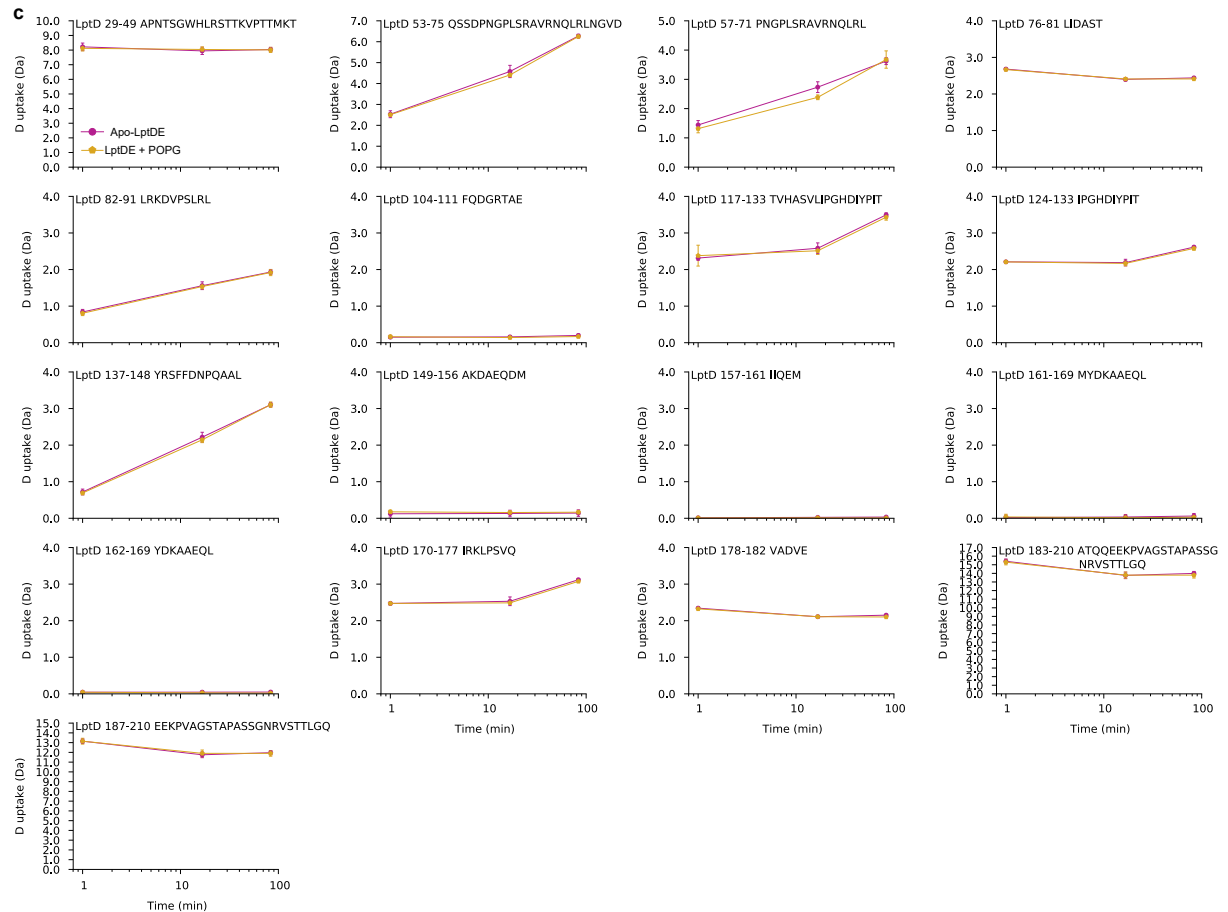

**Supplementary Figure 9. Deuterium uptake plots for LptE in all states.** (a) Deuterium uptake is plotted as a function of labelling time (0.167 – 420 min) for all identified peptides in the apo, LPS, thanatin and thanatin + LPS states. The apo state is indicated in purple, LPS-bound state in orange, thanatin-bound state in green, and LPS + thanatin state in maroon. Error bars indicate s.d. ( $n_{\text{biological}} = 2$ ;  $n_{\text{technical}} = 3$ ). (b) Deuterium uptake is plotted as a function of labelling time (1 – 83.33 min) for all identified peptides in apo, Re-LPS, and Re-LPS + thanatin states. The apo state is indicated in purple, Re-LPS-bound state in orange, and Re-LPS + thanatin state in maroon. Error bars indicate s.d. ( $n_{\text{biological}} = 1$ ;  $n_{\text{technical}} = 3$ ). (c) Deuterium uptake is plotted as a function of labelling time (1 – 83.33 min) for all identified peptides in apo and POPG state. The apo state is indicated in purple, and POPG state in gold. Error bars indicate s.d. ( $n_{\text{biological}} = 1$ ;  $n_{\text{technical}} = 3$ ). In some instances error bars are too small to be visible.

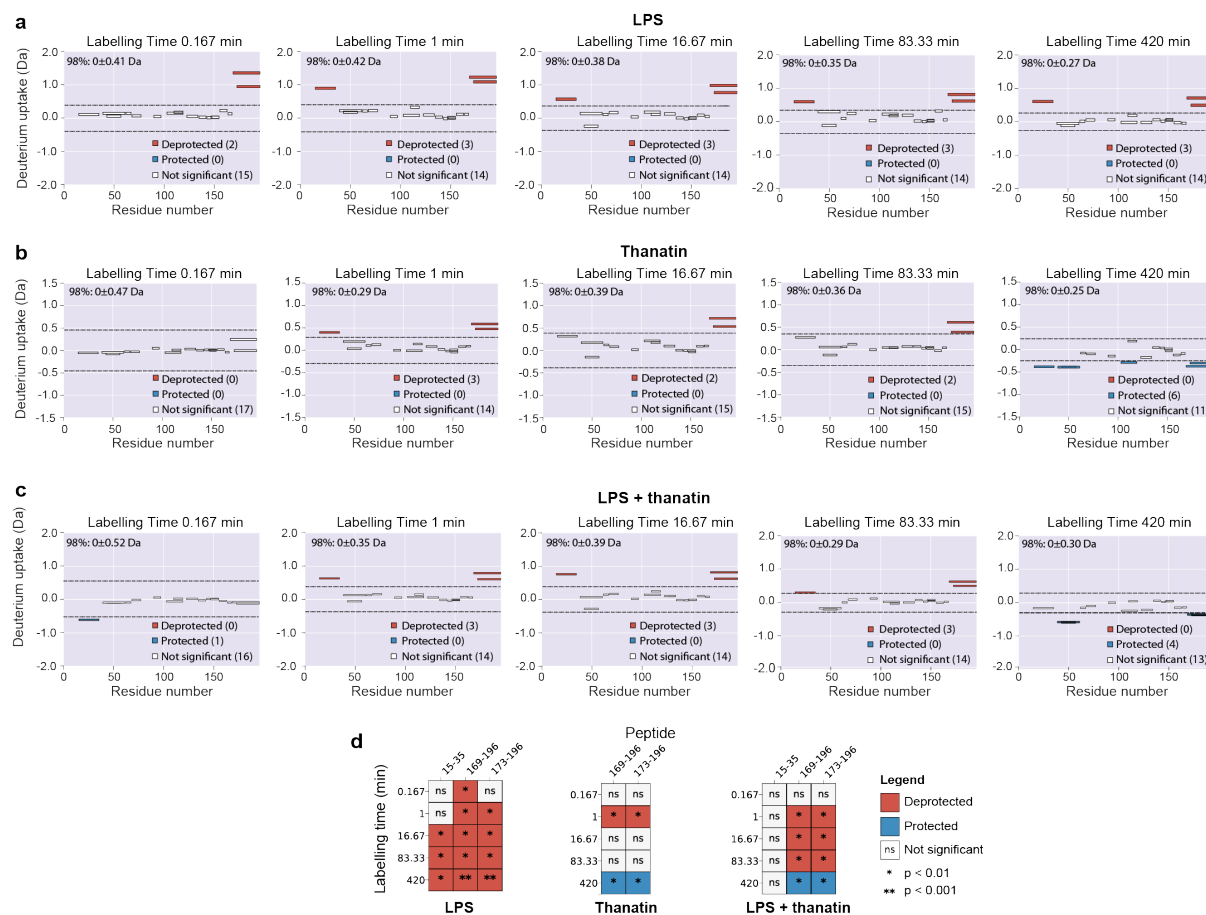

**Supplementary Figure 10. Woods plots and peptide table for LptE in the presence of LPS, thanatin and LPS + thanatin.** Woods plots showing the difference in deuterium uptake for each identified peptide in the presence of LPS (a), thanatin (b), and thanatin + LPS (c). The length of the lines represents the length of the peptides. The CI used to analyse each labelling time is 98%. (d) Peptides having a difference in deuterium uptake greater than the calculated CI according to the described methods are included in the table and Student's t-test (two-sided, unpaired,  $p < 0.01$ ) was performed to finally include only statistically significant differences. Red colour indicates deprotected peptides, blue indicates protected; white and 'ns' indicate non-significant difference; \*  $p < 0.01$ ; \*\*  $p < 0.001$ . Detailed information of HDX-MS data is provided in Supplementary Table 4.

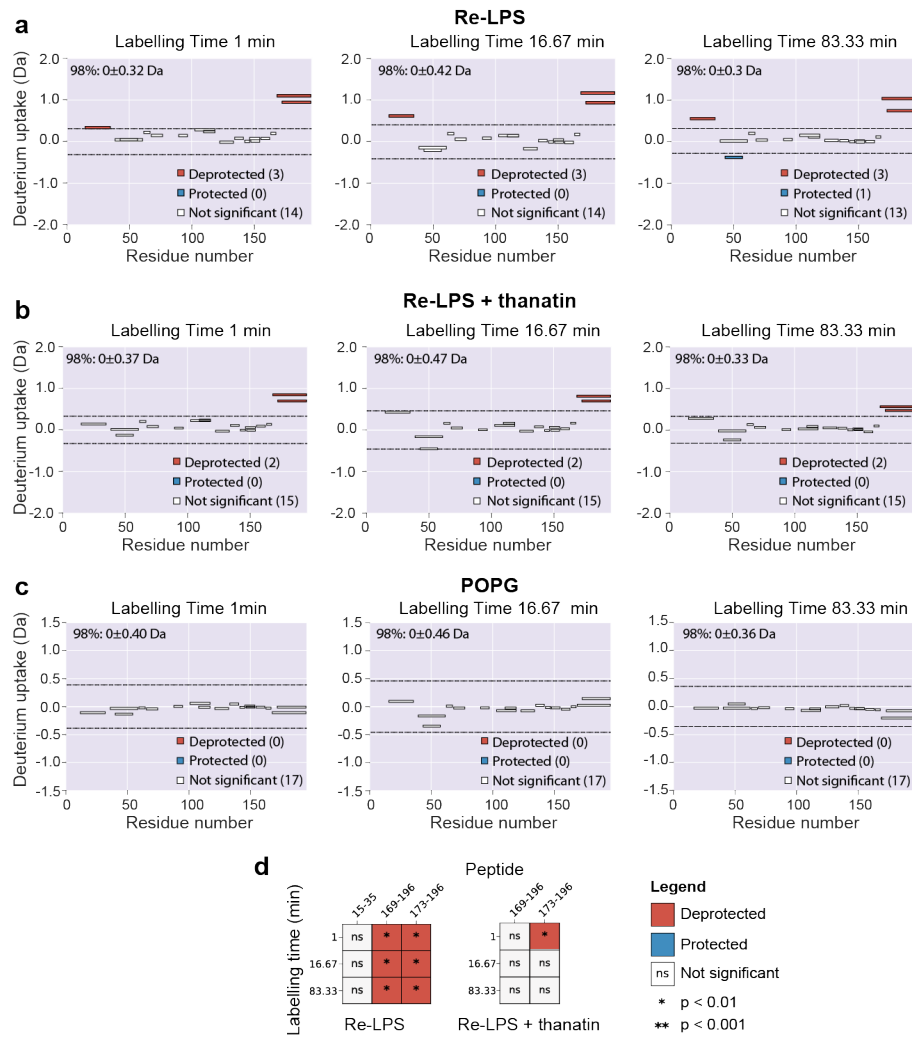

**Supplementary Figure 11. Woods plots and peptide table for LptE in the presence of Re-LPS, Re-LPS + thanatin and POPG.** Woods plots showing the difference in deuterium uptake for each identified peptide in the presence of Re-LPS (a), Re-LPS + thanatin (b), POPG (c). The length of the lines represents the length of the peptides. The CI used to analyse each labelling time is 98%. (d) Peptides having a difference in deuterium uptake greater than the calculated CI according to the described methods are included in the table and Student's t-test (two-sided, unpaired,  $p < 0.01$ ) was performed to finally include only statistically significant differences. Red colour indicates deprotected peptides, blue indicates protected; white and 'ns' indicate non-significant difference; \*  $p < 0.01$ ; \*\*  $p < 0.001$ . Detailed information of HDX-MS data is provided in Supplementary Table 5.

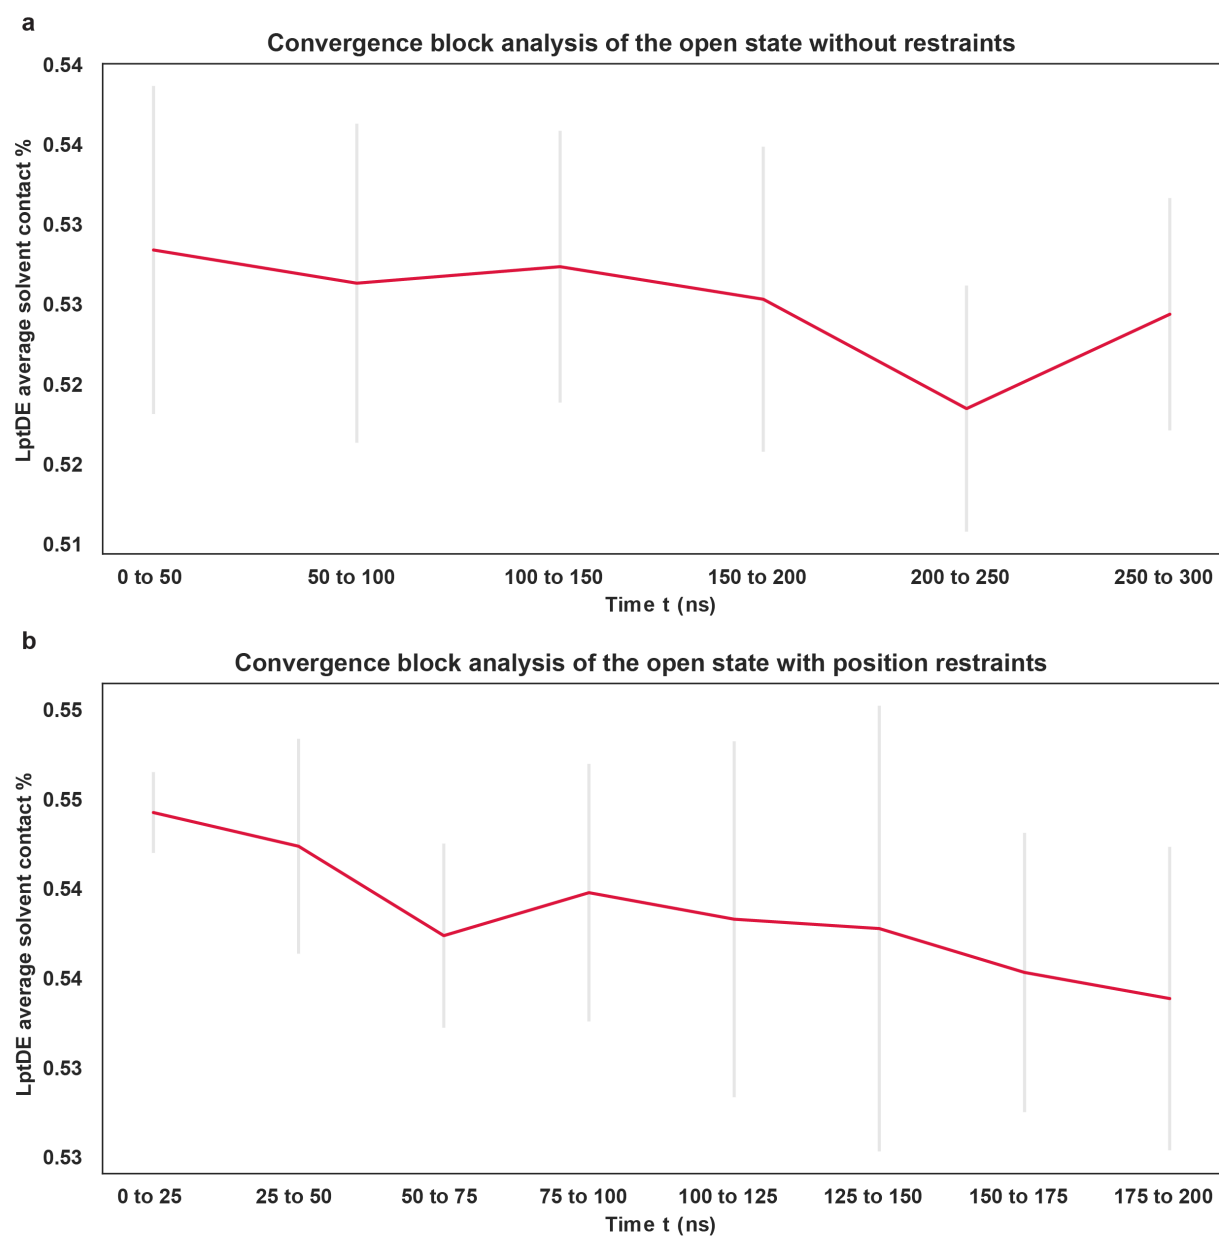

**Supplementary Figure 12. Block convergence analysis.** Convergence plot of the open Re-LPS bound state (a) without and with (b) PLUMED restraints, monitoring average solvent contact over all residues in LptDE. Error bars correspond to mean and s.d. of five repeats.

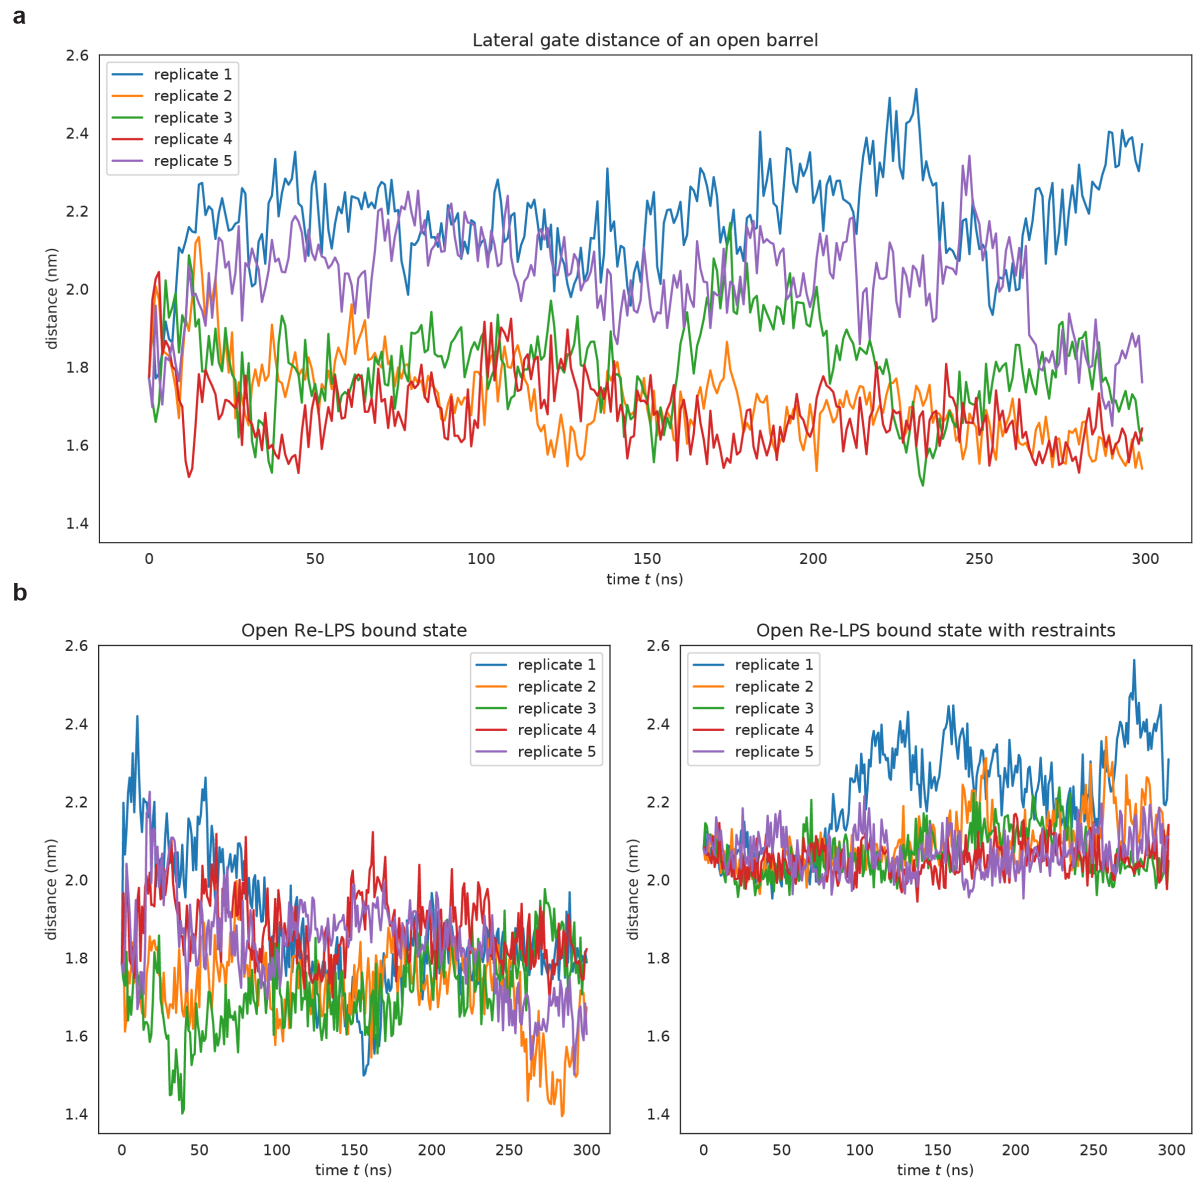

**Supplementary Figure 13. Lateral gate distance.** (a) Distance of putative gate on LptDE  $\beta$ -barrel when opened without Re-LPS bound to the  $\beta$ -jellyroll. Replicates 1 and 5 were found to be stable over the course of the simulation after sampling a distance above 2.25 nm. (b) Comparison of the lateral gate distance without (left) and with (right) PLUMED restraints.

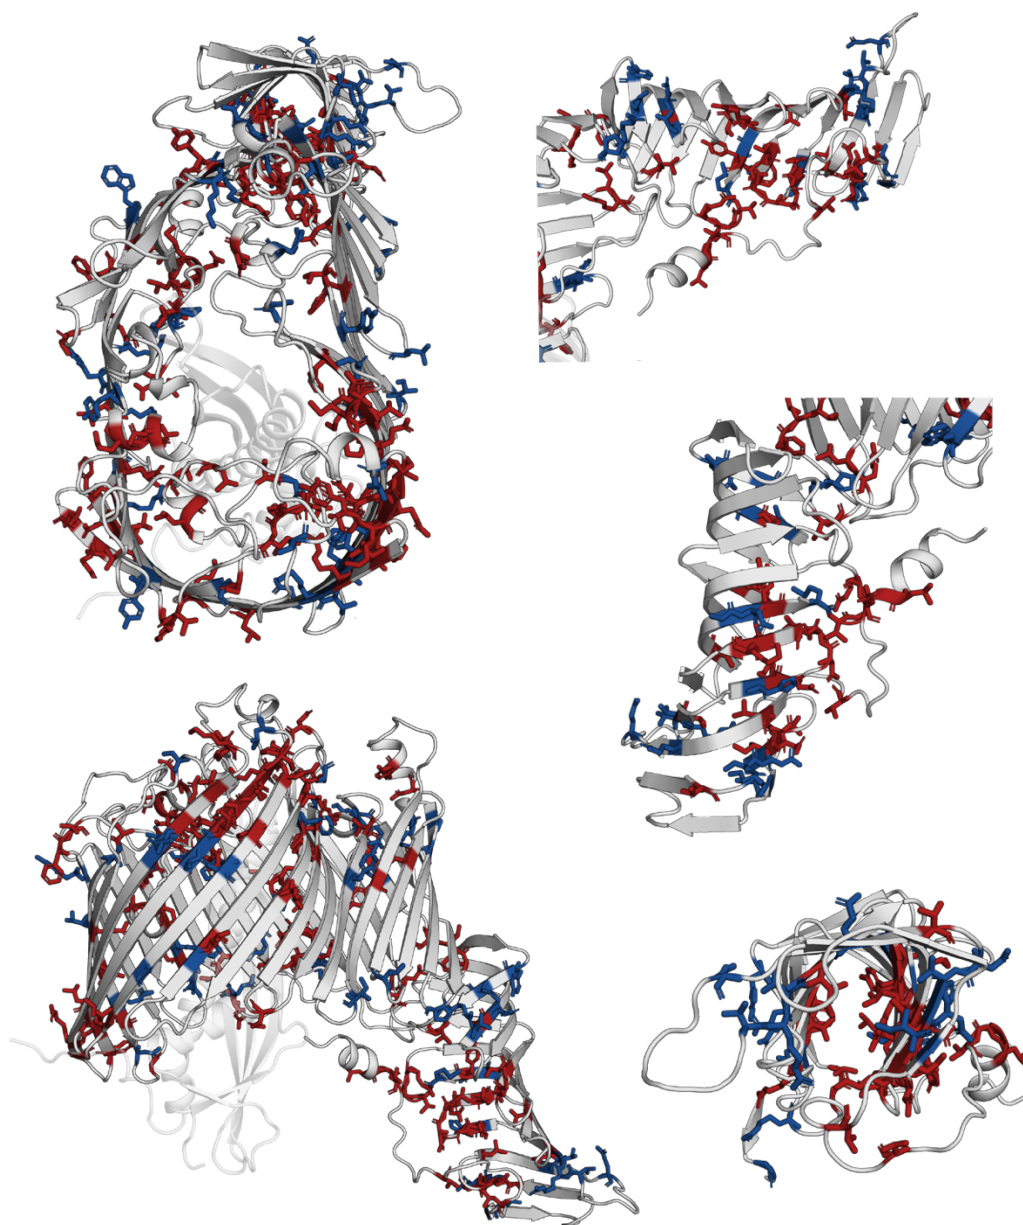

**Supplementary Figure 14. LptD open (Re-LPS bound) state vs closed state differential solvent contact map.** Different views of the residue by residue solvent contact map where every significant residue (CI 95%) is shown in the sticks representation. Loops pointing towards the extracellular side are highly solvated in our simulations, likely being more solvent exposed in a bilayer than in detergent, thus causing some peptides (e. g. 394-425 and 462-497) to be overly deprotected. Differences within the central peptides of the  $\beta$ -taco (e.g. 105-129) were found not to be statistically significant, which is likely attributed to the relatively short timescales of the simulation. Nevertheless, the binding of Re-LPS causes a substantial amount of deprotection in the  $\beta$ -taco by virtue of an open conformation.

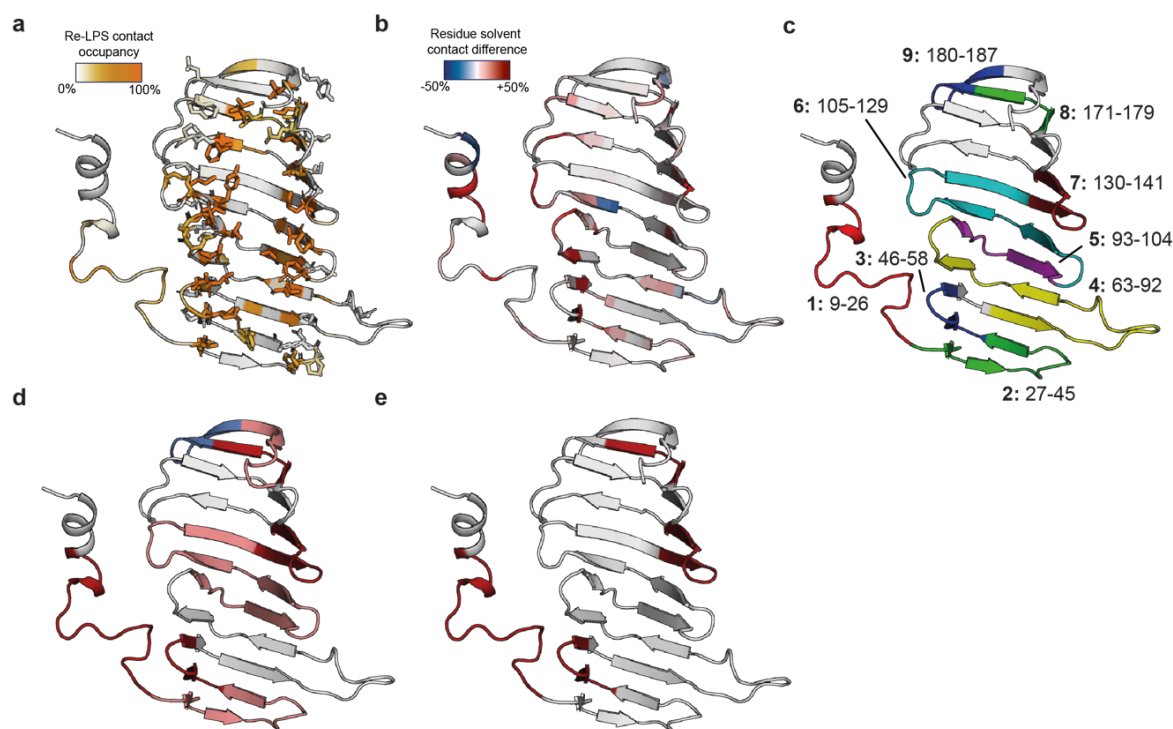

**Supplementary Figure 15. Comparison of Re-LPS contacts inside the  $\beta$ -taco with differential solvent uptake maps.** (a) Map of Re-LPS occupancy contacts with the  $\beta$ -taco, residues associated with increased solvent accessibility shown as sticks. (b) Residue differential solvent uptake map by percentage occupancy difference including all <95% significant values. (c) Peptide coverage of  $\beta$ -taco where peptides are coloured and number 1 to 9. Averaging the differential solvent values of each residue along these peptides produces (d) the peptide differential solvent uptake map including all <95% significant values. Peptides which pass the 95% CI are shown in red, those that do not are shown in pink or light blue). Peptide 4 shows no average increase in solvent uptake at all which is due to very few Re-LPS contacts correlated with an increase in solvent access, especially being averaged over comparatively large residue coverage (29 residues). This implies that this area would become more solvent exposed given more Re-LPS sampling in that region, however this is not possible due to the short timescales of the simulation as well as the rigidity of Re-LPS in the  $\beta$ -taco (see **Extended Data Fig. 6**). Also note that peptide 9 shows a slight overall protection owing to infrequent interactions with the inner leaflet of the outer membrane (**Extended Data Fig. 7**). (e) The final the peptide differential solvent uptake map after applying the 95% CI.

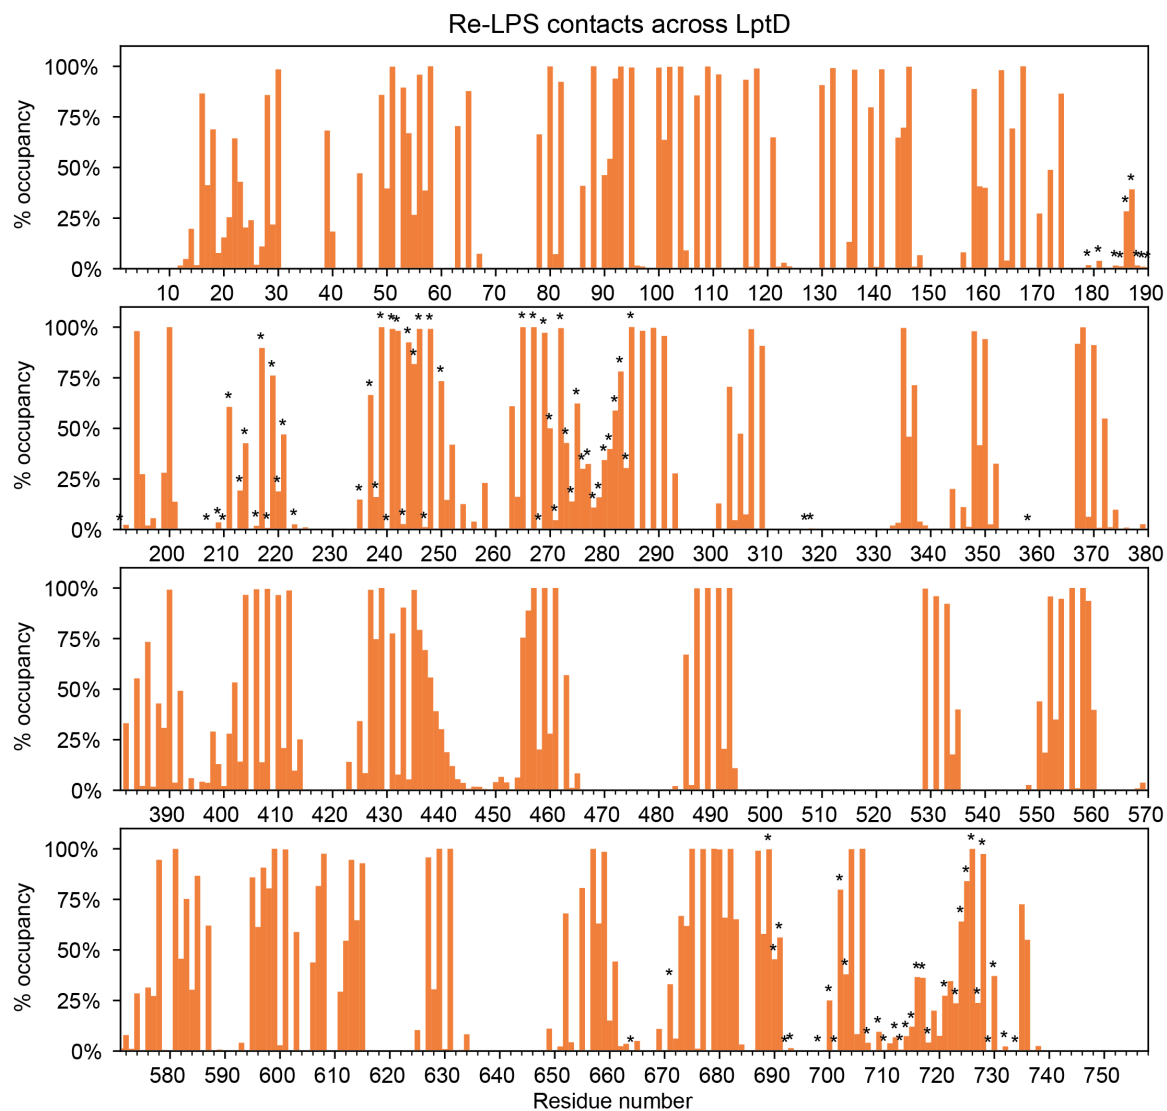

**Supplementary Figure 16. Re-LPS contacts with LptD.** The average Re-LPS contacts on LptD by percentage occupancy over the course of the simulation with the contacts made by the three Re-LPS lipids referenced in **Figure 2c** (Re-LPS(1-3)) highlighted (with asterisks) on the contact plot.

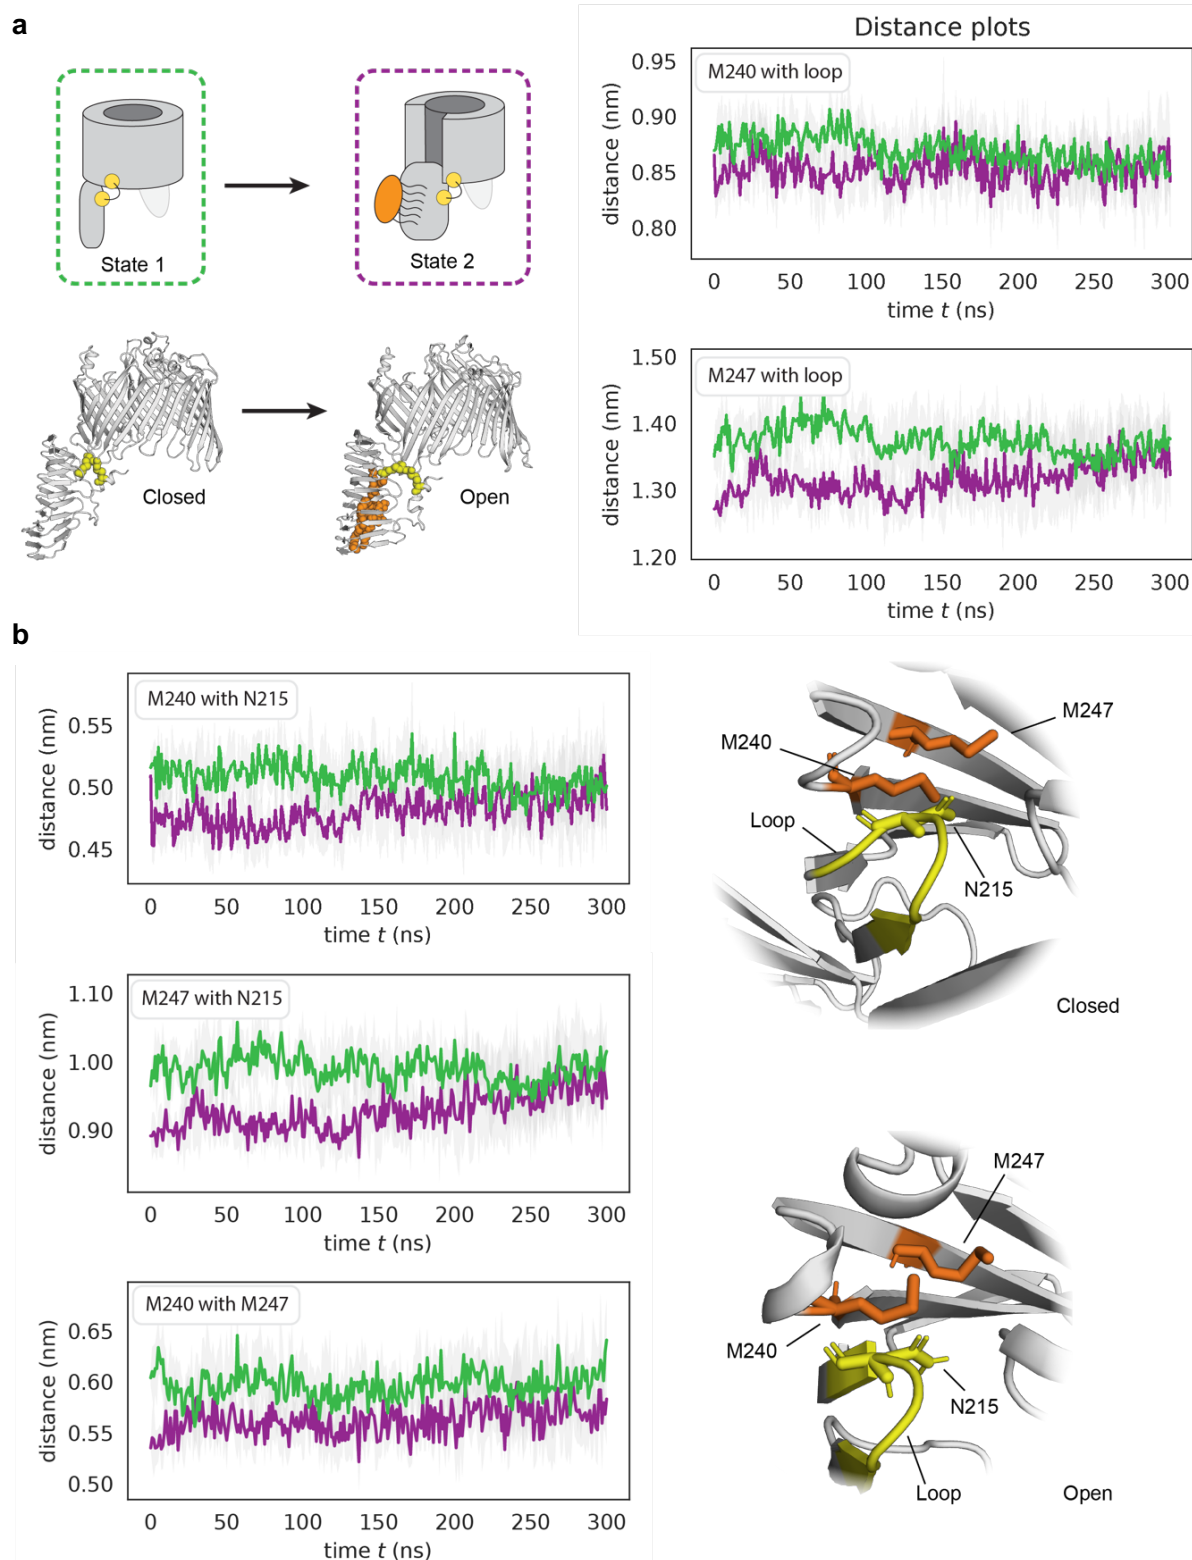

**Supplementary Figure 17. Residue distance plots.** (a) Left: cartoon schematic illustrating the difference between the apo closed state (green) and the Re-LPS bound state (purple). Right: distance plots between Met240 and Met247 from the loop located between  $\beta 1$  and  $\beta 2$  of the  $\beta$ -barrel. (b) Left: Residue distance plots between Met240 and Met247 as well as N215. Right: Schematic of the open and closed state conformations; methionines coloured in orange with the asparagine and loop coloured yellow.

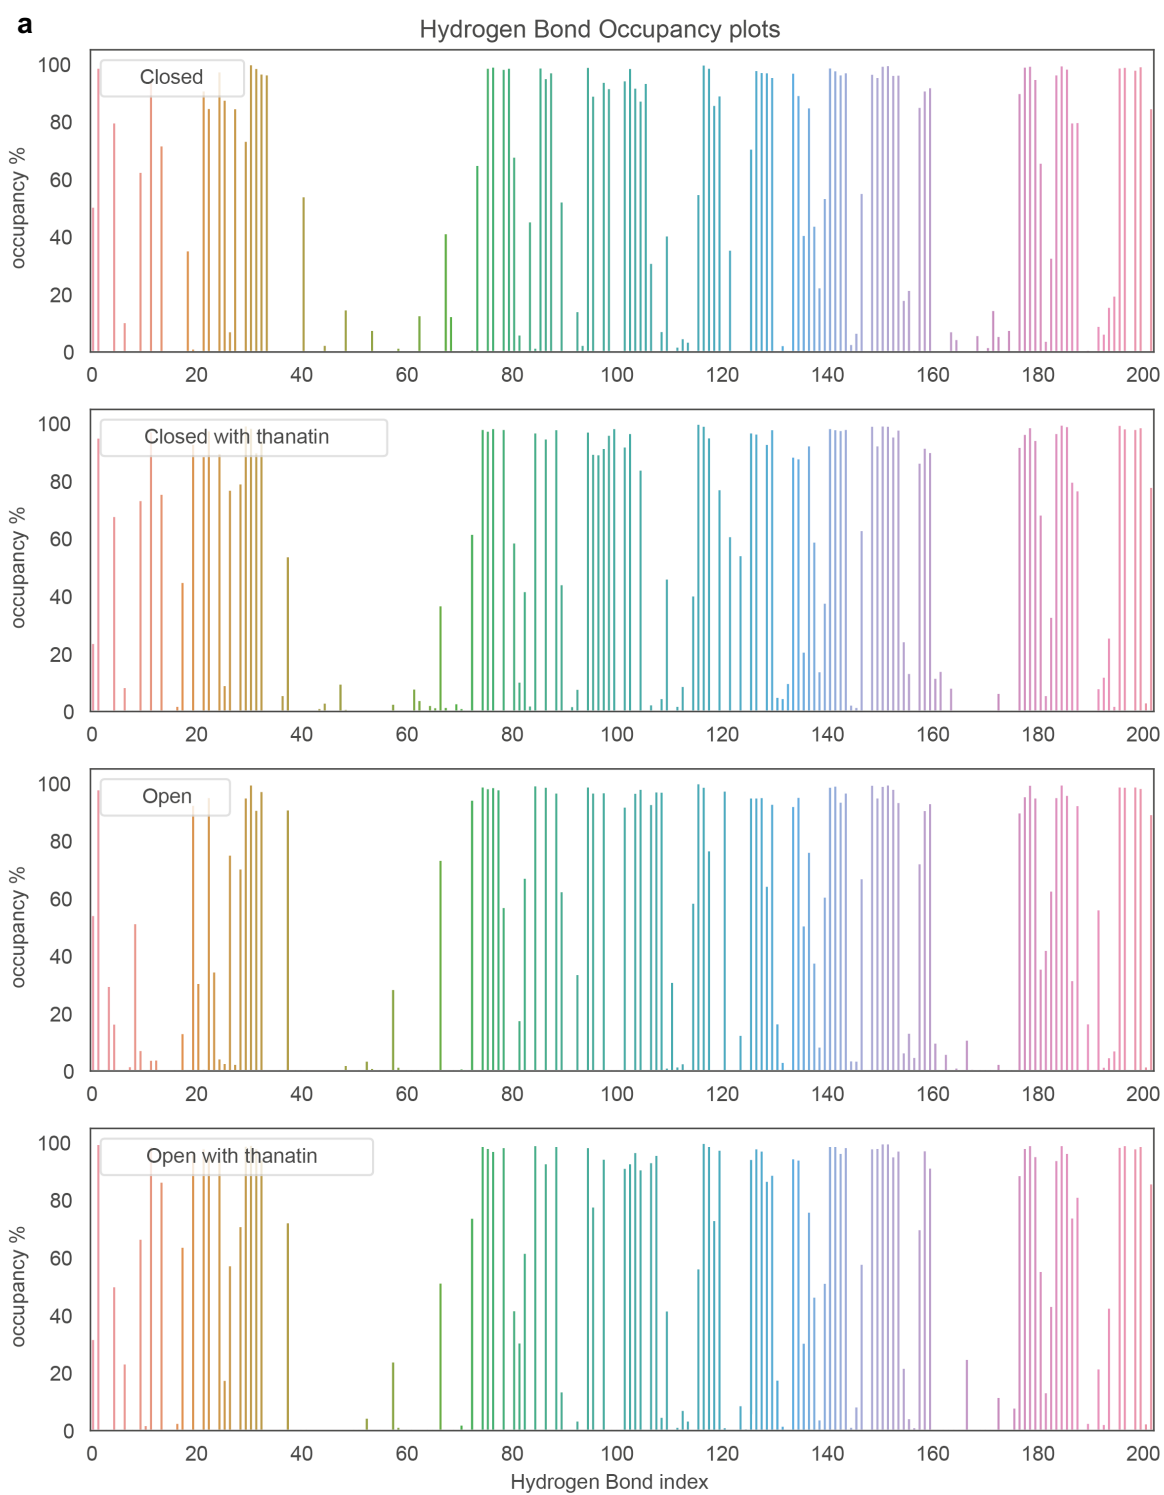

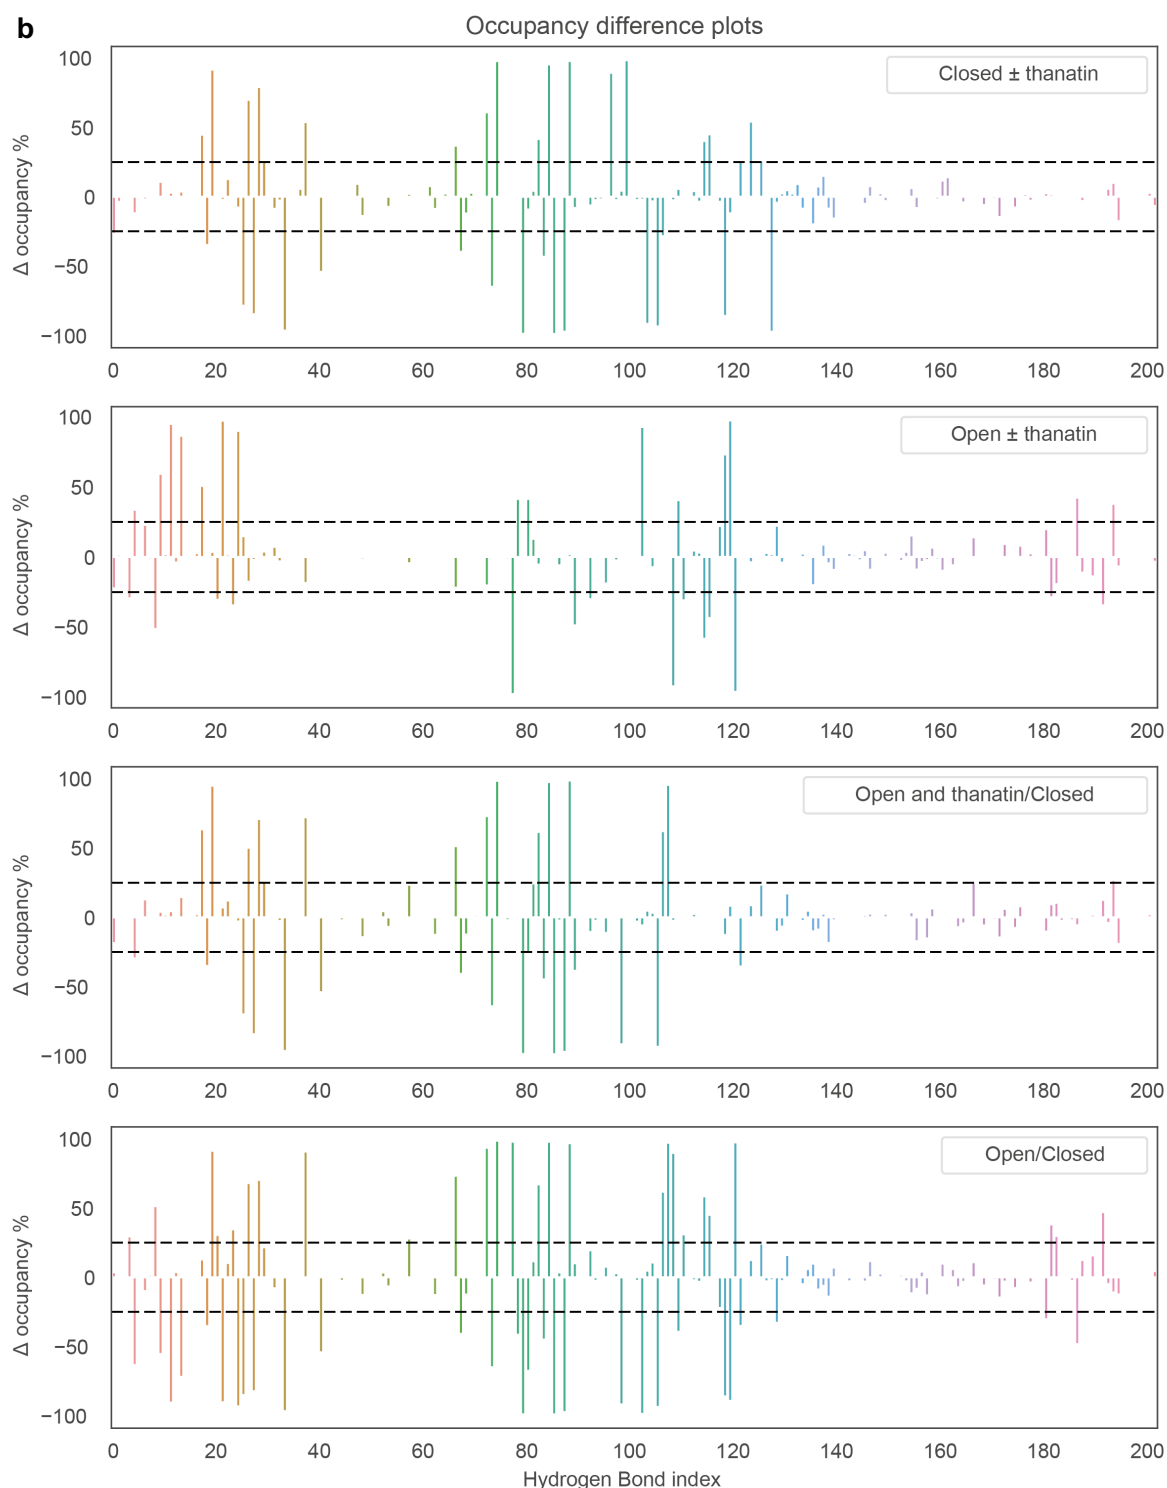

**Supplementary Figure 18. Hydrogen bond occupancy.** (a) Percentage occupancy of hydrogen bonds on different states of the  $\beta$ -taco, considering only the backbone hydrogen bonds between residues 28 to 182 (excluding the first strand which has direct contact with thanatin). Occupancy of the hydrogen bonds was calculated over all five replicates of the four different states of the  $\beta$ -taco: closed, closed with thanatin docked, open (with Re-LPS) and open (with Re-LPS) and thanatin (plots listed from top to bottom respectively). (b) Difference plots of hydrogen bond occupancy between states. From top to bottom, difference plot between: closed with thanatin and closed states, open (Re-LPS bound) with thanatin and open (Re-LPS bound) states, open (Re-LPS bound) with thanatin and closed states, open (Re-LPS bound) and closed states. In each chart, respectively arbitrary cut-offs at 25% and -25% occupancy difference are plotted.

## Supplementary Tables

| Complex                      | Experimental molecular mass $\pm$ s.d. (Da) | Theoretical molecular mass (Da) |
|------------------------------|---------------------------------------------|---------------------------------|
| LptDE                        | 108,472 $\pm$ 1.0                           | 108,473                         |
| LptDE + 1x Re-LPS            | 110,712 $\pm$ 1.2                           | 110,711                         |
| LptDE + 2x Re-LPS            | 112,949 $\pm$ 3.7                           | 112,950                         |
| LptDE + thanatin             | 110,907 $\pm$ 4.1                           | 110,909                         |
| LptDE + Re-LPS + thanatin    | 113,145 $\pm$ 0.7                           | 113,147                         |
| LptDE + 2x Re-LPS + thanatin | 115,382 $\pm$ 11.9                          | 115,385                         |
| LptDE + LPS (peak 1)         | 112,489 $\pm$ 13                            | N/A                             |
| LptDE + LPS (peak 2)         | 113,373 $\pm$ 3.9                           | N/A                             |
| LptDE + 1x POPG              | 109,221 $\pm$ 2.2                           | 109,222                         |
| LptDE + 2x POPG              | 109,972 $\pm$ 4.3                           | 109,971                         |
| LptDE + 3x POPG              | 110,718 $\pm$ 2.2                           | 110,720                         |
| LptDE + 1x CDL               | 109,930 $\pm$ 0.5                           | 109,931                         |
| LptDE + 2x CDL               | 111,388 $\pm$ 1.6                           | 111,389                         |
| LptDE + 3x CDL               | 112,845 $\pm$ 4.5                           | 112,847                         |

**Supplementary Table 1.** Molecular masses determined by nMS.

| Data set                                                     | Apo-LptDE                                                                                                                 | LptDE+ LPS    | LptDE + thanatin | LptDE+ LPS+thanatin |
|--------------------------------------------------------------|---------------------------------------------------------------------------------------------------------------------------|---------------|------------------|---------------------|
| <b>HDX reaction details</b>                                  | 200 mM NaCl, 25 mM Tris-HCl (pH 7.5), 10% (v/v) glycerol, 0.03% (w/v) DDM.<br>Percent deuterium: 91.7%. Temperature: 20°C |               |                  |                     |
| <b>HDX time course</b>                                       | 0.167, 1, 16.67, 83.33, 420 min                                                                                           |               |                  |                     |
| <b>Back-exchange (mean/IQR)</b>                              | ND                                                                                                                        |               |                  |                     |
| <b>Number of peptides</b>                                    | 68                                                                                                                        |               |                  |                     |
| <b>Sequence coverage</b>                                     | 70.5%                                                                                                                     |               |                  |                     |
| <b>Average peptide length/redundancy</b>                     | Average peptide length = 13.4 residues<br>Redundancy = 1.66                                                               |               |                  |                     |
| <b>Replicates</b>                                            | $n_{\text{biological}} = 2$ ; $n_{\text{technical}} = 3$                                                                  |               |                  |                     |
| <b>Repeatability (average SD)</b>                            | 0.079                                                                                                                     | 0.087         | 0.083            | 0.088               |
| <b>Significant differences in HDX (16.67 min time point)</b> | Reference state                                                                                                           | CI 98% = 0.37 | CI 98% = 0.39    | CI 98% = 0.37       |

**Supplementary Table 2.** HDX-MS data summary table for LptD in apo state and LPS, thanatin or LPS + thanatin states.

| Data set                                              | LptDE + Re-LPS                                                                                                            | LptDE+ Re-LPS +<br>thanatin                               | LptDE + POPG                                              |
|-------------------------------------------------------|---------------------------------------------------------------------------------------------------------------------------|-----------------------------------------------------------|-----------------------------------------------------------|
| HDX reaction details                                  | 200 mM NaCl, 25 mM Tris-HCl (pH 7.5), 10% (v/v) glycerol, 0.03% (w/v) DDM.<br>Percent deuterium: 91.7%. Temperature: 20°C |                                                           |                                                           |
| HDX time course                                       | 1, 16.67, 83.33 min                                                                                                       |                                                           |                                                           |
| Back-exchange (mean/IQR)                              |                                                                                                                           | ND                                                        |                                                           |
| Number of peptides                                    | 63                                                                                                                        | 63                                                        | 68                                                        |
| Sequence coverage                                     | 69.1%                                                                                                                     | 69.1%                                                     | 70.5%                                                     |
| Average peptide length/redundancy                     | 13.3/1.56                                                                                                                 | 13.3/1.56                                                 | 13.4/1.66                                                 |
| Replicates                                            | $n_{\text{biological}} = 1$<br>$n_{\text{technical}} = 3$                                                                 | $n_{\text{biological}} = 1$<br>$n_{\text{technical}} = 3$ | $n_{\text{biological}} = 1$<br>$n_{\text{technical}} = 3$ |
| Repeatability (average SD)                            | 0.082                                                                                                                     | 0.076                                                     | 0.080                                                     |
| Significant differences in HDX (16.67 min time point) | CI 98% = 0.44                                                                                                             | CI 98% = 0.42                                             | CI 98% = 0.45                                             |

**Supplementary Table 3.** HDX-MS data summary table for LptD in Re-LPS, Re-LPS + thanatin, and POPG states.

| Data set                                              | Apo-LptDE                                                                                                                 | LptDE+ LPS    | LptDE +<br>thanatin | LptDE+<br>LPS+thanatin |
|-------------------------------------------------------|---------------------------------------------------------------------------------------------------------------------------|---------------|---------------------|------------------------|
| HDX reaction details                                  | 200 mM NaCl, 25 mM Tris-HCl (pH 7.5), 10% (v/v) glycerol, 0.03% (w/v) DDM.<br>Percent deuterium: 91.7%. Temperature: 20°C |               |                     |                        |
| HDX time course                                       | 0.167, 1, 16.67, 83.33, 420 min                                                                                           |               |                     |                        |
| Back-exchange (mean/IQR)                              | ND                                                                                                                        |               |                     |                        |
| Number of peptides                                    | 17                                                                                                                        |               |                     |                        |
| Sequence coverage                                     | 87.4%                                                                                                                     |               |                     |                        |
| Average peptide length/redundancy                     | 12.8/1.36                                                                                                                 |               |                     |                        |
| Replicates                                            | $n_{\text{biological}} = 2$ ; $n_{\text{technical}} = 3$                                                                  |               |                     |                        |
| Repeatability (average SD)                            | 0.090                                                                                                                     | 0.083         | 0.079               | 0.088                  |
| Significant differences in HDX (16.67 min time point) | Reference state                                                                                                           | CI 98% = 0.38 | CI 98% = 0.39       | CI 98% = 0.39          |

**Supplementary Table 4.** HDX-MS data summary table for LptE in apo state and LPS, thanatin or LPS + thanatin states.

| Data set                                                 | LptDE + Re-LPS                                                                                                               | LptDE+ Re-LPS +<br>thanatin                               | LptDE + POPG                                              |
|----------------------------------------------------------|------------------------------------------------------------------------------------------------------------------------------|-----------------------------------------------------------|-----------------------------------------------------------|
| HDX reaction details                                     | 200 mM NaCl, 25 mM Tris-HCl (pH 7.5), 10% (v/v) glycerol,<br>0.03% (w/v) DDM.<br>Percent deuterium: 91.7%. Temperature: 20°C |                                                           |                                                           |
| HDX time course                                          | 1, 16.67, 83.33 min                                                                                                          |                                                           |                                                           |
| Back-exchange (mean/IQR)                                 | ND                                                                                                                           |                                                           |                                                           |
| Number of peptides                                       | 17                                                                                                                           |                                                           |                                                           |
| Sequence coverage                                        | 87.4%                                                                                                                        |                                                           |                                                           |
| Average peptide<br>length/redundancy                     | 12.8/1.36                                                                                                                    |                                                           |                                                           |
| Replicates                                               | $n_{\text{biological}} = 1$<br>$n_{\text{technical}} = 3$                                                                    | $n_{\text{biological}} = 1$<br>$n_{\text{technical}} = 3$ | $n_{\text{biological}} = 1$<br>$n_{\text{technical}} = 3$ |
| Repeatability (average SD)                               | 0.052                                                                                                                        | 0.063                                                     | 0.073                                                     |
| Significant differences in<br>HDX (16.67 min time point) | CI 98% = 0.42                                                                                                                | CI 98% = 0.47                                             | CI 98% = 0.46                                             |

**Supplementary Table 5.** HDX-MS data summary table for LptE in Re-LPS, Re-LPS + thanatin, and POPG states.
